# Supplementary material for: Ensemble of Nucleic Acid Absolute Quantitation Modules for Accurate Copy Number Variation Detection and Targeted RNA Profiling
Source: Research Square preprint supplement (doi:10.21203/rs.3.rs-923491/v1), 2021-09-28
Supplement: Supplementary file 1 [file 4df2b4b3b5ff26765b93964c.xlsx]

## Sheet: Fig1
Fig. 1b
	ddPCR ERBB2		ddPCR EIF2C1		QASeq ERBB2		QASeq EIF2C1
Replicate	Molecule count	Yield	Molecule count	Yield	Molecule count	Yield	Molecule count	Yield
1	1605.63	0.575495	1662.89	0.596018	2227.5	0.798387	2318	0.830824
2	1382.75	0.495608	1384.94	0.496394	2428	0.870251	2411.5	0.864337
3	1633.84	0.585606	1629.41	0.584018	2438.5	0.874014	2468.5	0.884767
4	1178.77	0.422497	1189.72	0.426422	2565.5	0.919534	2341	0.839068
5	1526.17	0.547014	1559.14	0.558833	2400	0.860215	2389	0.856272
Fig. 1c
Input DNA (ng)	ERBB2 molecule count
1	126
3	683.5
10	2283
30	5907
100	25010
Fig. 1d
Replicate	ERBB2 ploidy
1	2.08126
2	1.98641
3	2.02461
4	1.82499
5	1.99083
Fig. 1e
UMI sequence	UMI family size
AAAATATCTTTCCCT	164
ATCTCTTACACTTCT	153
CCAATCACCTTTTTC	128
ATCACAATAATTATT	119
CTTCTATTATCATTC	112
CTCCCAATTCTTTAC	112
CTTCTTTACCATATT	108
CATTATATTTTCCTA	101
CTACACCTTATCTAC	99
CTATATAATTCAAAC	98
CTAAATTTTATTACT	95
CTTCACATATTTAAA	95
ATACCAAAATTACAA	95
CCTTATTCTTTAAAA	93
ATCTAATTTCTCCAA	93
CTTCTTTTTCACACA	92
CAATATATTTCATCA	92
CATATAATACTATCA	91
CTCATTCTTATAATT	90
CAATATTCACTTATT	89
ATTTACACATTTCTT	89
CATATTACTAATTAC	89
ATCTTTAAATTTTAC	88
CAATCTACATTTCTT	88
ATTACATCTTTCAAA	87
AATCAAAACTATTTT	87
ATTTACTTTATCAAA	87
CATTTCTTCTCTTAT	86
CTAATTACCCATTAT	86
CTCTCTATTACAAAA	86
ATCTTTCCATTTCCA	86
AATCTTTTCTTATTA	86
AAATTCTTTCCAACT	85
CTCTTACTTCAACTA	85
CTATATTTTCAATCA	84
CTTTTCATTCAACTT	84
AATTTATCCCTTATT	84
AACTCTTTTCACTTT	83
ATTCTTCTAAACCTT	82
ATATCTATCTTCTAA	82
CACTTTACATTTTCT	81
CCCACAATTTTATTT	81
CAATCCAAACACTTT	80
ATTCTACAATTAACT	80
CTAATTACTTTTTTC	79
TCACATAAACATTTA	78
CTAAAATATTCTCTT	78
CAACTCTTATATCTC	78
CATCTCTTACATACT	77
CTATTAATCTATCTA	77
ATCTACATTTCCTTT	77
ATATCACTTTTTTAC	77
ATTTTCTCAATTTCT	77
ACATTTTCCCATATC	77
CTCCTCTACTTTATT	76
ATTAATTCTCATCAA	76
CTCTTCAAACCATTC	76
ATCCATTAAATCACC	75
CACAATCAAAATCAT	75
TAAACTAAATTATAT	74
ATTCTCATATTCTAT	74
ACACCTTTCATTATT	74
AACTCTTCCTTATTT	74
CTTTATTCACCAATA	74
AATCATATATTTTAT	74
AAATCTCATATAACT	74
CTAAACCTTTCATTC	73
ACATTTACATTCTTA	73
AATTCAACTCTATCT	73
ATCTTTACTTTTTCA	73
CTATCCTACTAAAAA	73
AAATTAACCTCATCT	73
TTACTCACTCTTAAC	72
ATACTATCTAATATT	72
TATCATTACATTTCT	72
ACTCTTTACATCAAT	72
ACTACTATTTTCCCA	72
TTTCCTTTTCAACAT	72
CTTAATCACAATATA	72
ATATTCCTCCATAAA	72
CTTCCACTAATTTTA	71
CTTCTTTACAATCAT	71
ACATACACTAATTTC	71
CATTTTTCACTCTAA	71
ATCCTTTTCACTTTA	71
CCTCATTTTCAAATT	71
ATCCTTTCAAATAAA	71
AATCTTTCTATCTAC	70
ACATTACATTTTATA	70
TTTCTCTATCAATTA	70
AACCACATTTATTAC	70
CTCTTCTATCATTTT	70
CTCCTTCATCTCTTA	70
TATTCAAATCTACTA	70
CTTTAATAATTAATA	70
CCTACTCAATTTCAT	70
CTCTTATCTACTCTC	70
AATCCTCACTTATTA	70
TTAACTTTCCAATAT	69
TAACTTATTATTCAA	69
CCTAATTCAATTCTT	69
AAATATTAACATTAT	69
CATACCCTCTCATTT	69
ATCATATCATATCAT	69
TTCCATAACCAAACT	68
CTTCCATCCTACTTA	68
ATTTCCTATTTACAC	68
ACATTATCTAACTCT	68
CCCTCTACTACATTA	68
ATCAACTTTATCTTT	67
CATTATCACTAAACA	67
ATCTTTCATTCTTCT	67
ATCAATACATATCTT	67
CATATATATTTTAAA	66
CTTCTCTAATTTACA	66
CCAATTTATTATCAA	66
TACATTACCCTTCAT	66
CTTCCATCTCTTTAC	66
ATTACTAACTCCATT	66
ATTTTTTTCACCCAT	66
CTATTTTTAAAATCT	66
CTTACTTATTACACA	66
ATCAATATTCATCAT	65
CAACATCTCATCTAT	65
ACTATCTCACATTCT	65
ATCACTTCATTTTCC	65
CTAATTTATCAACTC	65
TTAAAAATCAAAATT	65
CACTATCTTAATTAT	65
ATTCTCTTATACCAA	65
ATTAAATCCTTAAAT	65
CTTCCCACATTTCAA	65
ATATATTACTCCCAT	65
ATACTAATTCTTATA	65
CTTCAATACTATAAT	65
CAATATATTCACTAT	65
CATTATATCTCTAAA	65
AACACTTATATTTAC	64
AAACCCTTTAACATT	64
CTTAATTAAATACTT	64
ATCTACTATTTATCT	64
CCTTTATTAAACAAC	64
CTTATTTTCCCCTTC	64
CACTCATCATTAATT	64
AAACTTTATCCTTAC	64
AATCTTAATTATCAA	64
TATCTTCACCTTATC	63
ATTTTTCCATATCCT	63
CACTCATACTAAATT	63
CTAATAACTTCTACA	63
CCACATTTCTCTTTC	63
CCTTATCTATCTCAA	63
AACTTCTTCTTATAC	63
ATCATTTTCCACCTT	63
ACTCATTACTTCATA	63
CTTAATATTCTTTAC	63
CAAAATTTTAATTTT	63
ATTTCCTAATCCCAA	63
CTTTTAACTTATAAA	63
ATTCTTTTATTCATC	63
CATTCCTATCCTTCC	63
CTCTTTTACATTCCT	62
TAATCCAACCATATT	62
TATTCAACATTTCAT	62
AAATCAATTCCTCAC	62
CATAACTAATATACC	62
ACTTTATCCACTCCT	62
CATTATATCTTAATA	62
TTTCACTTTTTCTAC	62
TTTCTCTCCTCCTCA	62
CTCTTTTTTTCCCTT	62
CTACTCTTAATCATC	62
CTAATATCCCTATTA	61
CTATAAAATAATCAT	61
CCAATTTTATCATTT	61
ACTATAATTTTTAAA	61
TCACAATCTCTTTTT	61
ATCTAATTCCTAATA	61
CAAAAATTTCTCAAC	61
ATTTATTCCATATAA	61
AATTAACATAATTCA	61
CCTTTTACCTCACTC	61
ATTTCACTTTAATAT	61
CATTTATCTTTTCAA	60
AATTTTCTCACTCTC	60
ATTCTACCCTCAATA	60
CCCCTATTTTCTTTA	60
CTTAATCTTTAAATA	60
ATTATCCTTATTCTT	60
ACATCTTTATCTAAC	60
CCTAATTCTCTACTA	60
ATCAAATTATTCTTC	60
ATAATTTCTATTTCT	60
ATCTTTTCTTACACT	60
CTACAAAAAATCTTA	60
ATCTAATCTATCTAA	60
TACACTTTTCCCTTA	60
CTCATTACCCATTCA	60
CATCATTATCAATTC	59
CCCTTTATCTCATTC	59
AATATTTCCCACTTC	59
CCACATCCAATACTC	59
CTTATACCTCAATTT	59
ATTTTTCCCCATTAA	59
TTCAATCATAAAAAT	59
ATTACAATTTAATTC	59
CACCTATTATTCCCT	59
CTATTACTTTTACTT	59
CTAATACATCTAATA	59
ATTCACAATCATACA	59
TTATATAAACCATCT	59
CCTAATAAATCTAAT	59
CTTCAAACTACTCTT	59
CATCATATTTAATTT	59
AACATTATTACTCTA	59
CCATTCTCTCTTAAC	58
ATCACAACTATCATT	58
TTCTTTACTTATTAA	58
AAATTCCTTTCTCCA	58
CCTTTCTTATCTACC	58
CATCTATACCTCTTC	58
CATATCAATCATTAT	58
CTTATCATTTTTCAC	58
TCATTCCTACTTTTA	58
CAACCTCCTCAATTC	58
CACTTTATCCTACTA	58
CCACAAACTTATATA	58
TCTATACTCTTCTTA	58
ATCTATTCAAAATCA	58
CCTATACCTCTATTT	58
ATTATTATACTCATT	58
CCTAATAAACTTATC	58
ATTCCATTACTCATT	58
CTTATAAACTCAAAT	58
CTTCATAAAACATTA	57
ATAATTTTACACTTA	57
CAATCATATTTTTAC	57
CTCATTTAAAAATCC	57
CTTTTAACTCAATAC	57
ATAACTTTATTACAT	57
ACTCTCACATCTTAC	57
ACAATATTTTTCATC	57
TAACACTACATTTCC	57
AACTCTTTCATCACT	57
ATTTCCTTTTTCTTA	57
CATATACATATCAAC	57
CTTTTTCCACCCAAC	57
CATTATCAATTTTCA	57
CCTTTTTTTTCAAAT	56
AAAATCTATTCAAAT	56
CATAATAATCTTATA	56
ATACACTTACTCCAT	56
CTCTTCTTAATCCTT	56
CTATTTAATACATAC	56
CTAAAATTATCAATC	56
CTTAACCCTACAATC	56
ATCACTCTACTTTTC	56
ACTACTTTCATTCAT	56
TATCTCTATTCCCTC	56
CACTTTTACATTCAT	56
ATTCTTCCCTTCTCA	56
AAACTTTATCATACT	56
CTTCACTATTAACTT	56
ATCCTCTCTCATTTT	56
CTTATAATCAATCAA	56
ATCTTAAATTCTTCA	56
ATTAAATATTTCCCT	55
CCTCTTCATCAATCA	55
ATTCTCATTTTTATT	55
TCTCTATTACATTTT	55
ACCCTTCTCACATTT	55
AACTTTCACAAATTT	55
ATACCTTTTCTAATT	55
CACCTTTCTCATTAC	55
ATCACCACTAAACTA	55
ATCAATTTTACCCTC	55
CAATAAAACCTATTT	55
TTTACACATCTACTC	55
ATTAAATTCCTTCCA	54
CTTTTTCACTTTAAT	54
TCTCTCTTATCTCTT	54
TATTAACTATATTTC	54
ATTTATTCTAAACCT	54
ACATTTATACACTTC	54
ATCAATTAATTTCAT	54
AATTCATTTCTCCAT	54
TAACTTTAATAAAAC	54
ACTTTTCCTTCACTA	54
CCTCAACTATATTCT	54
CCATCTCTAAATTAT	54
TATCAATCAACCAAA	54
AAATTTTCTACACAA	54
CATCCATATTTTAAC	54
CTCCAATACATATCT	54
CACTTTAAACCTTAA	54
ATTTACAAAACAATT	54
CTCTCTATAACTAAT	53
AATCACTTTACTACT	53
AATACACCCATAATT	53
ATACCCATCATTTAT	53
CTATTACATTATTTA	53
CATCATTTTTAACCC	53
CCTTCCACACAATCC	53
TCCATTTAATCCAAA	53
AACTTACATATAAAA	53
AACACACTTATTCAT	53
ATTTAACTACTCACA	53
TAATTTTTCCTTTCA	53
TTTTCACATTCTCCC	53
ATTCTTATTCAATAA	53
TCAATTTAACACTCA	53
TCTTTTAACTTCACC	53
AACTTTTTCCATTTA	53
AATCTTCATTAACTT	53
TTCACATTTTAATTT	52
AACACAATACTTTCT	52
ATAATTTTTTCTCCT	52
TCTATCTTATCTCAA	52
CCTTTATATTCTATT	52
CAAATACATTACACA	52
CTCACATTCTTTTTT	52
ACATCTCATAATCCT	52
CTAAACCTTTTACTC	52
TTACTAATCACTTTT	52
CATCATTTTATTTCC	52
AATATTCTACTTTTT	52
TAATTTCTCATTTTT	52
TTACTATTTACCACT	52
ATCTCACTCATACTC	52
ATTCCAATCCTTTTA	52
ACTCTATTCACATTC	52
TCATATTTTCTTTAA	52
CTCTTTTCATTTCCA	52
ACTTCTTCTTTATCT	52
AATTAAAACACTCTT	52
TCTACACCATAATCT	52
CACTTTTCATTTCTT	52
ATACTCTATCACTCA	52
TATTACTTATTTTTA	52
AATTTTATCCATTTC	52
ACTTAATATTATCTC	52
CAAATTACTTAAAAT	52
ATTCAAATTTCCTAT	52
TTTCTAATTAAATTA	52
ATTCTCATCTTCTTA	51
CACATTTACCTCATA	51
CAATCATAATTTAAC	51
AACAATATTTCCAAT	51
CATATTTCCATTTCC	51
ATCTTTATACCTTAT	51
CTTTTAAATTTCTCT	51
AAAACCAATACTTTC	51
CTTAACTTCAAAATT	51
ATTTTTCTCTTCTCA	51
TATTTTCTAATTTCA	51
CATAATCCTATTTTT	51
ACAATTATAATTCTT	51
ATCATTTTACACTCC	51
CACTCCTCATTCTCT	51
CTTACTTTACATCTA	51
ATCTTATATCATTTT	51
ATTCTTAATCTACAC	51
ACTTTTTTTATAATA	51
CTCTTCTATTTTTAA	51
ATCTCACTATTAATC	51
AACCCACTTTTATCC	51
ATCTATTATTCCCTT	51
TAATTCTTTTCATTC	51
ATACATATCTCTTCA	51
AACATTTCAATTTAA	51
ATACTAATTTAATAC	51
CTCAATTCATTAATA	51
TTTCTATTTACACCT	51
AACAATTCTTACTCA	51
TTATTCAATATTCTT	51
AATTCTTTTCAATAT	51
AACTTTTCCAAATTA	51
AATACTCTACCTTTA	51
AATCATTTAAATCAC	51
CCTTTTTTATAAACC	51
ATCTATTTATCTCAT	51
CAACCAAAAACTCTT	51
TTTCCCAAACTTCCT	51
AACCCTCATTCTCTT	51
TATCAATTAACTACT	51
AATTTTTACCCCTAA	51
CTTCCAAATTATATC	50
ATATATCTTCTTTTT	50
TCAATTTTTCAATTA	50
ATTTTACTTACCTAA	50
CTTTACACTATATCA	50
CATACATCAATTTTT	50
CACCAAATACTATAT	50
CTCTCCTAAATTATT	50
ACCTTATATTTAATA	50
CTTTTACCATACACC	50
CCTTCTTATTCAATC	50
CATTTTCACTTACCA	50
TTTTAAACAATTTAA	50
CTTCATTATCTTTTT	50
AACATCACCTATTTT	50
TTTTCAAATTAAATA	50
CTCCTCATATTCTCT	50
AACTATCCATTTCAT	50
ATCTAATTTATTCAT	50
AACAAATTATTAAAT	50
ACCTTTTCACTATAA	50
ATACTACATTTATTA	50
ACTCTACTTTATATC	50
TCAATACTATTCACT	50
AATTTCATCTTTTCA	50
CTTTCAATTTACAAT	50
CTTTCTTCTTTAACT	50
CTTCCATATTTACAA	50
CAACCTCATATAACA	50
TTACTAACAATTTTC	50
AACTTTACTACACTC	50
CTAATATTACTTTCT	50
CTTTTACTTCCATAA	49
TCTACTTTACTCCCA	49
TTAATCTCACTCACT	49
TATACTTTTTAAATC	49
ATCTCTATTTAACTC	49
CCATTTCATTTACCC	49
AATTCTTTACTTCCT	49
AAATATTTCTTCAAA	49
CTTAATATATCACAA	49
ATATCTATACCACAA	49
CTTCCCTATTTACAC	49
CTTACCAATTTTAAA	49
CAATACTATCCTATT	49
TCATTCTTCCAATTA	49
ATTTTTAACATTTCC	49
CTCTATATTTAATAC	49
TTCTTTTTCCATTTC	49
TCTTTAACACCTTCA	49
CCTAAATTCCATAAC	49
TAAATCTTTTCAATT	49
CTTTAAAAACATTTC	49
ATTTATTTTCTCACA	49
CACACATTTATACCC	49
CAATTTCTTTAAAAC	49
ACTAACTATCATTCC	49
CAATTTCCAAACATT	49
CTCCTTATCTTTAAC	49
ATTTCATCATCCTCA	49
CCATTATAACTTTAT	49
CAATTCTTTAAACAT	49
CAAAATTAATTTCAA	49
CAACTTTATATTCTA	49
ATTTCAACTACATAT	49
ACACATATTTACTTT	49
ATCATTCCTTTTCCC	49
TTCAATTCTACCTAA	49
CTCATCTAACTCTTT	49
CTAACAATTTTTACT	49
CTAAAACTTACTCAT	49
TTATTCACTTTATAA	49
CATTAACAAATTTAC	49
CAACCTTTAAAACAT	49
AATTTTCCTATTCAC	49
TCAATCTAACTTTCT	48
ATCCTAACTCTAATT	48
CATCCTATTTCTATC	48
ATATTAAATCTATTT	48
CTCTTTTAACCATAT	48
CTTTCTAAAATTATC	48
CTTTAATACTCCAAT	48
ATTTACTTACCCTCA	48
ACATCTCAAAATTCT	48
CACACTTACAACTCT	48
CTTATAAACATTACC	48
AAACTTCTTTTTATC	48
TCATTTTCAATCCTC	48
CAACTTTTCCCTTAA	48
ATTTACATCTCTTAT	48
TTTCTTATTAATCAA	48
AAATTACTCAATATT	48
TATACCCTTCTTTCT	48
AAATCTAACCCTCTA	48
CTTATACCAACTTTT	48
CCTTTCTTTTTAATA	48
ATTACCTATTATACA	48
CACTTCATTTATACC	48
ACACTTATTAATTAA	48
CACATTATATTATAA	48
ACTTTTACTTACATC	48
TTCATCATAACCCTA	48
ATTATATCTACTACT	48
AATTTATCCTTATCT	48
ATCATAATTTTTTTT	48
ATCCTTTTCAACAAA	48
CAATACTAACATTCT	48
ACTTTTCAAATATTC	48
ACTTTCAATCTCTAC	48
CTTTCAATTTATCTA	48
CTTATTAATATTCAT	48
TACTCTAAAATCTTT	48
CTAACTTTTCAAATT	48
CTCCTTTATCTTCTC	48
TTTATTCCAAATTCT	48
TTCATAAACACTCTC	48
TACTTCAATTAACCA	48
ATCATTTTTTACCAT	47
CTAACTCTCTTTTAA	47
TTCTCTAATTTTTTC	47
AATTAATTAACTCAA	47
CTACTTTATTAAAAA	47
AAATTCTACCCATAT	47
TACTTCTATAAACAC	47
ATTACTAAATCTCAT	47
CACATCCCCTTATTT	47
TCTCACATTTTTTAT	47
CTACATCTCACTTTT	47
TTTAATACTTCTTCT	47
TTCATCATATATCTC	47
TCTCTTCATTTCTAT	47
AACTTTCTCCATCTT	47
ACATATTACCCAACA	47
CATCATTTTTAATCT	47
TACTACTTTTCTCAA	47
CTTAAATCACATCAC	47
TTCAAAACCTCTCTA	47
CACTTATCAAATTTT	47
AATACATACCTTTTA	47
ATTTTCAACACTTCT	47
CTCTACATATCTCTT	47
CATTATTTAAACATC	47
AAATTTACCCTTTTT	47
TTTTCAACCATATAA	47
CTTTCTTTTCCTACT	47
TCTCATTTAAACTTC	47
CAATATTTCTCATCA	47
TTATCATCAATTTTC	47
ATATATTTTCTCCAC	47
ATTCTTACATTCTAA	47
CACCTACATTAATTA	47
AAAATCCATCAATAA	47
ATCTTTTCCTTTACA	47
TTTCTCACTACTCCA	47
CCTTTTCTTAACCAC	47
CAAATAATTAACAAA	47
ACTATATAATTCATT	47
CAAATTTATAATTAT	47
ACTTCATCATTTATT	46
ATTTCTATATTACAC	46
CCTTAAACTTTCTTT	46
TTACCTTATCCATTT	46
ATTTACTATACATCA	46
CTAATAAACAATAAT	46
CTCAATCTTTACATT	46
TTACTTATCAAAATA	46
ATACTAATTCTTTTT	46
ATTACTCATTCTTCT	46
TCATTTATAACATTC	46
ATTTCATCTACTTTC	46
CATTATATACTTTAC	46
TATACTTCATCACTA	46
TTTAAAATCTCATCA	46
AAAATATCCATACTC	46
ATCCTACACATCATT	46
CTTCATTATACCTCA	46
ATAACTTCATATCAT	46
ATATCTTTCATAAAA	46
TCTCCAATATACTCA	46
CTCTTATTCTATTCA	46
TTCTTCATTTCATTA	46
CTATTTATACTATTA	46
CTACAATATTAAAAC	46
ATTTACAAATTTATT	46
ACCTATTTTTCTACT	46
AAACCTCATAAATTT	46
TTCTCATATACAACT	46
TTAATTTTCCCTCCT	46
ATATTTTACTCCACT	46
TACTTTACTTCTATC	46
TTCATTTCATATAAA	46
CTTACTCAAAATACT	46
TCTTCCACACTTCTT	46
ACACTTAACCTTCCT	46
CCTTTAAAACATCTA	46
ACCATTTTAAACCAA	46
TCTCACAATTTATTA	45
TATATTCTCTTCACA	45
AATTTCTCTTTTTAC	45
CTTTAAAAATCTTCC	45
CATCTTAAAATATAA	45
ACATTCTTTAACAAT	45
AATTTTCACTAACTT	45
TTCTCCATAACTTAC	45
CATAACTATTCTACC	45
TCATCCCATAATTCA	45
TATCCTAAACATTTA	45
AATCTTTAACTCATT	45
CCACTCTTTATTATT	45
ACCTATTCACCTACT	45
CTTTTCAATTTCTAA	45
TTTATCCATCATAAC	45
CTTATCTTTAATTAC	45
TTATTTCTACTTACA	45
AATTCATATTATATA	45
CTTACAATAATCTTA	45
TTAACCTACATTCCT	45
ACAATCTTTACACTT	45
CACATATAATACTTC	45
CCATTTTACATCTTT	45
ATATTACTTTTCACT	45
TTTCTACTTCTTCTT	45
TTTTTTAATATTCTT	45
ATCTTTACCTCTTTA	45
TAAATTACAACCAAC	45
ATATTCTAATCTTCT	45
ATCCAATCATTTTTT	45
TTCATAATAATCCAT	45
CTACTTTTAATTCTT	45
AATATACTTTTTCAT	45
CTTCTATATAATATA	45
ACATTAAATTATTCA	45
CCTTTAACATATTTT	45
CTTCTCATCTTTTCT	45
CCTCTATTATCCTCA	45
ATTTTTCAAACTCTT	45
CTTTCCATTAAACCT	44
CATTTTACCCTAACA	44
ACATTATTTCTACAA	44
CTTCCTAATCATCTT	44
TTTTCCATTTTCAAA	44
ACTATTACTTCACAT	44
ATCAATTCATTTCAT	44
ATTTTAATTCTACAC	44
TTCACCATTCCCTAA	44
CACTCTTTCTAATTC	44
AATCAACTATAATTT	44
ACTTACATTCTATTA	44
CATCTTTCAATAACA	44
CTTTCCAATTACTAC	44
TATCTTACCTCCTCA	44
ATATTTTACATCTAC	44
TTTTACTTCAATTTA	44
TTCCTCCTCTTTCTC	44
CAAATCTATCATAAA	44
CATTTATCACATTTT	44
TATTTACTCAACTCA	44
ATTCATTATCCATCT	44
ACATATATTTTTATT	44
TTTATCAATTTACTC	44
CTATTCATCATTTTT	44
ACATTTATCTAACTT	44
CATATTATCTCAAAT	44
TACACTATCACTTTT	44
ATTCCCATATTTCCT	44
ATTAAATCAATACCA	44
ACTCCCTTTTAAACA	44
ATAATTTCATTATCT	44
AAAACTCACATTATT	44
CCTTTTCTTATTCCC	44
TACTCAAATTTCTAT	44
CTTTTCATAATATCC	44
AATTTATCTTATATC	44
CAAATCTCAATTATA	44
AAACAATATTTACAA	44
ACCAACTATATTATC	44
CTTTCTAAACCTTTA	44
ACTCTCTTTCCCCTT	44
TTACTTCAAAATTTC	44
TTCTTTATTCAAATC	44
ATACAAATTTCCCCT	44
CCATATAATTTCTTT	44
CTTAATAAACTTTTA	44
TTTCATACAACACAT	44
AATACATCTTCCCTA	44
CAAATCCTCATTTAA	44
AATTTCTTACATTAT	43
CTTTATATTATTCAC	43
AATATTTCACACCTA	43
TTCCTTTTTAAAAAA	43
TCTTAATCTCAATCT	43
ATCCTACAATTTTTT	43
TACTCTAATTATCAA	43
TATAAAATCTATTAA	43
TCTATCCTATTTTTA	43
TATATCTATATCCAC	43
TACTATATTTTCATT	43
ATTATACACTACTTA	43
CTTTCACATTTAAAT	43
ACTCCAACTTACTTA	43
CCCTATTATATCTTA	43
TATTTAACACCTCTA	43
ATCCATTATATATTT	43
TTCTTTAATTTCACT	43
CTTTACATCATTCTA	43
CCTTCCCTTTTATTA	43
TTAACTATCAACTAT	43
AATTTCACTCAACCT	43
ATATAATCAACAATC	43
ACTTATTTTCTATTA	43
CAAATCTCTATATTC	43
CAATTACCTTTATTT	43
ATTCCCCATCTTTAA	43
ACTTATACCTTAATA	43
ACTATTTCATCCATT	43
ATCCCATCTTTATTC	43
ACTTTTCCATTATTT	43
ATAATTCTACTCCTA	43
TATACCCAAACATTT	43
CTATAAAATAACTTT	43
TTACTCTTCAAATTC	43
ATTATATCAATTTAA	43
CAAAAACATATAACC	43
TTTAAACTAATTCCA	43
AATTCTTTCACATAA	43
CAATTATAATTCTCC	43
TCCTTTTTCCATATT	43
AACACTTTTCACTTT	43
TAATTTCCTAAACCA	42
CTCATAACTTATTTT	42
AATTTCACTATAATT	42
ATTTTATTTTACATC	42
TCTCTTTACTACTCA	42
CAAACATAAATTATT	42
TCATATCTATATACT	42
CCTCCTATTTCATCT	42
ACTTTCATCACTCCC	42
TCTTCATATCAACTT	42
CTCCAATTTTTAACA	42
ATTCTACCCATTTTT	42
TTTACTTCCAAAACT	42
ATTTACTATTAACCT	42
TATACTTCTTTCATA	42
TTTTAAATTAATCTT	42
CTTCTAAATTCTTTT	42
CCTAACCTCTTTTTC	42
TTCTTATAATAATTT	42
CACTATAAACATTAA	42
CATCATTCTATTTTC	42
CATAATTTACAATCC	42
AATACTTTATCCTAA	42
CAATTACCCCTCACA	42
ATAATTTTCTCTTTT	42
AATATAATTACATCC	42
CACTTCTAAATCTTT	42
TCAATTTAATCAATA	42
TTAATCCATAAATTT	42
ACTAATTTTTCAAAA	42
CTCAAAAATATCCTT	42
TATAAATTTTAACCA	42
TCATTAACTATTATC	42
AATTCATTCTTCATA	42
ATCAATTCTACTCCC	42
ATCATTTCTAATCAA	42
CATATAAAAATTACT	42
CCCAATTTTCTATTC	42
ATTATTTACTCCATC	42
ATAATTTCACTAATA	42
CTCATTTTTCTAAAA	42
ACTTCTCTAACTATA	42
AACAACTTATTACCC	42
ATCTTATCTTCACAT	42
CACATCCTCTTTTCC	42
TTTCACTATTACTAC	42
TAACCTCATATCATC	42
TTACTTTTAAAATTC	42
TTTAACTAATCACAA	42
TTTAATCTTCCACAC	42
CATTTATATCTTAAA	42
ATTTCAATCTCTCTT	42
AAACTTTAAATTCCA	42
ATACTCATAAATTTT	42
CCTCTTTATCTTATA	42
TTTAAAAATAAACCT	42
CCATTTACCTTATAC	42
ATTATAATTTCCCAT	42
TCTTACATAATTTTT	42
ACAAAACCCTTATTC	42
AAACTCTATTATTTT	41
AATTATCATTCTTCT	41
CATCATTTACTTAAA	41
AAAACCTTTTATCAC	41
CACCTCTAAATTATT	41
ACTAATCTTATAACC	41
CACATCTTTTATACA	41
ATTTAATTAACTACA	41
ATTACTTTACAATTA	41
CATTAATTTCTTCTT	41
ACCATAATTTATATC	41
TACTCTTACCCTTTC	41
ATTTCCATCCAATAA	41
ATAATATCATATAAA	41
ACTCTTTTATACAAC	41
ATAAACTTTATACAT	41
CAACCTTTATCTTCT	41
ATCCATTTACTTTTA	41
ACATCCAATATATTT	41
CCAATTTAACTCTAT	41
TACCATTTATCATTT	41
CATAATATTCAACAT	41
ATACTTTAACATCAT	41
ATTATAAAATCTTAA	41
TTTTTACAATTCATC	41
AATTTCTCACACTTA	41
CATATACTTTAATCT	41
CTCATTTATACATAC	41
CTCTCTAACTATCAT	41
TAATTTTCAATTATC	41
CCCACTTTTAACCTC	41
CTACTACTTTATCTA	41
ATTTCATCATCTATA	41
ATAACATCACTTCAT	41
CTACTCAAATTTTAA	41
CAACTATTCATTTTC	41
CTAACTCCTTTTTTT	41
CCTTCTACTTTCACT	41
TATTTACATATTCAT	41
CTTAACCTCTATTTT	41
TTTTTATATCACATC	41
TTTTCTAATATTTTA	41
CATAACTCCCCAATT	41
ATCCACTTATTTTCC	41
TAATACTAATACTAC	41
TCTTCCAACTAATTT	41
ATCTACTTCCCACTT	41
CTATTCATTTCTAAA	41
TCTTCCTAAACCTCC	41
CTTTAACATACTACT	41
CTATTTACTATAACC	41
TTCTCATTATCTACC	41
TCCTATTTCATTCTA	41
TTATCAACCTTTTTC	41
ATTTCACATCAATTC	41
CATTTATACTATACT	41
TTCTCAAACTTCCTT	40
CATTTATCTTTACTA	40
CCTTTCAATTTATAT	40
ATTTCCACTTTTAAC	40
CTACCTAATCAATTT	40
ATTCATTTACTATTA	40
CTTAAATTATCATTT	40
TCTTCTATCTAAAAA	40
ATTTTTTATCAATCA	40
TATACCTATTCCATC	40
TACCATATTTTAATC	40
TTCCATTATTCATCA	40
TTTTCTCATAATAAC	40
CTCCCTTCATAATTT	40
AATCCTATCTTTTTC	40
TCCTTTATTACCTTA	40
TTTTTCTACAATTCT	40
CTCTTTCTTTTACTT	40
TTTTCTAAACCTTAT	40
TTCCCTACAATTTAT	40
CTTAAAAAATTTTTT	40
ATACATCTTTTAAAA	40
ATATTTTCTACCAAC	40
TCATATATTTAACTA	40
TATTTAAATCCTTAT	40
TTTATATACTTCTAT	40
CAAATCTAATTTAAT	40
CATTATACTTTTATC	40
TTCTTCACTCTTACT	40
ATACCTAATTCTATT	40
AATACTATCCTTCAT	40
TCTACTTTAACCTTA	40
CAATCAAAAAATTTT	40
CTTAATTACTCAAAT	40
ACCTTTTTTTCTTTC	40
TTATTTCTTCAATAC	40
TTCCACCAAATTCTT	40
TATTCAAACTCCTTT	40
CTATCTATTTATTTT	40
AAATAACTTCTTTTC	40
CACTCAAATCATATT	40
ACTATTAATCTTTTA	40
TTACAATTTCAAAAA	40
TTCTAATTATCTATC	40
ATACTAATTTTCTCT	40
ATCCTAATTTTCTCT	40
TCATCTCTCTAAACT	40
TCTCAACTAATTCCT	40
TATCAAAATTCTTTC	40
CTTACATAACTTTAC	40
TAAATTACCAATCAT	40
CTTCATCAAATAATT	40
TTTCTACTATACCCT	40
TTATATTATCCTCTT	40
ATTCCTTACTAAACT	40
TAAAAACTCTAAAAT	40
CAATTCTTATCCCAC	40
AAACTTTTAACCTTC	40
ATTATATTTCCCATT	40
CCACCTATCTTTTAA	40
ACTATTTACTATTTT	40
TTCCCCTACATTCTT	40
ATACATTTAAACAAT	40
TACAAAATTCTATAC	40
TCCAATATCATATTT	40
TCTTACCTTAATTCC	40
TTTCTTTCCTAATTC	39
CCCTTTTTCTTAAAA	39
TAAATAACAATCTTA	39
ATATTTTTCACATAC	39
ATATATTAACTTAAA	39
ATCTTTTACTAATAC	39
TCATACATACTTTTT	39
TTCCTCTTATTAATA	39
TTATAAATATCTTCA	39
ATTTTCTTAAACATT	39
CTATAATTATTTTAC	39
TCTCATTTTCTTAAC	39
TATTTCTAATAATTT	39
AACTATCCTTTTCAT	39
ACCAATATTTACTAC	39
TATAACAAACCATTT	39
ATACTTCTACTTTTC	39
ATCATTTTATCCAAC	39
AAATTTACAACTTCA	39
AATAACAAATATTTT	39
AATCACTAATTACAT	39
CATCATACTTATTTA	39
ACATCTCTACTCTCA	39
TTTTAACTATATCTA	39
ACTCTTTTAAATCTC	39
CTTTTTACTAAAATT	39
CATCTTTTACACAAC	39
AATATATTTCAATCC	39
ATTACCATCTTTAAA	39
CACAACATTTTACAC	39
ATTATCCTTCATTCT	39
CTTTTATTAACATCT	39
TTTAAATCTCATATT	39
CTATATCCAACCATT	39
TCCCAACTTTCTTAT	39
CTATTATCATTAATT	39
AACTTTATTTACCAC	39
ATTTTTCTTCTTCAT	39
TAATTCAATTTCTCT	39
AACTTTTAACTTTAC	39
CTCTTAATTCATAAT	39
TCAAAATTATCTTTT	39
CATTATTTATTAATA	39
TCCTATAATATATTT	39
ATTATCTCCACATTT	39
AATTTTATCCCATTA	39
AATTCCTAATCTATC	39
TCTAATAAAACTTCC	39
AATCTTACCTATCCA	39
AAACTCTTACTTCTT	39
CCTTATTATCTTAAC	39
CATTTACCTTATCTT	39
ATTCCAATTTTCATA	39
ATTTTCATAATCTAT	39
CTTTTCAACTTTTTC	39
CATTAATCAATCCTT	39
CTATACACCTTTATT	39
AATTTCTTATCCTAT	39
TCAAATTATTATAAA	39
CTTCTACTCTCACCT	39
CCTCATACTCACCTA	39
CAACTTCTCATATTT	39
TCTTTTACCTACCTC	39
ATTTTTCCTTTCCCA	39
CTTTCTTAAATAATT	39
ATTTCTTCATCCTTT	39
TATTAACATTTAATT	38
TATCTAAATTCATTT	38
TCAATTCCAAACTTC	38
ATTCATCTAATAAAA	38
AATTCTCATTCATCT	38
ATATTCCTCTATAAC	38
ATCTACTTTTATCCA	38
CTTCTTAAATAACTA	38
TTTTTATCTATACAA	38
CCTTTCCTCCCTTAC	38
TCTACAATATTCTTA	38
AAATCAATATAAACT	38
TTTCAATTATCCCAT	38
TTATACTAATTTCAA	38
TAATATTCTACATTT	38
TTCCATATATTAATA	38
TTTTTAACTTTCCTC	38
TAAATTTCTCTATAT	38
TTAACCCCCTTTTCA	38
TCATTAAAATCTTAC	38
TCCATTTTCCTCCAT	38
TCTTAATATACCACA	38
ACCATTTCAACTTTT	38
TCCAATAATATTTTT	38
ATCTTTCATATTCTA	38
CTATCTACTTATTTT	38
CCTTCAATAATTAAC	38
CCACTTCAATTTCTC	38
TCATTTTCATTACCA	38
TTTTCCTCACTTTCA	38
TATATATCCCAAAAT	38
TCCTAAAATCTTATC	38
TTTCATTTCCTCCCT	38
ACTCTCCTTTATTAT	38
CTCTTTTAAATTAAC	38
ATCCATAACTCTTAT	38
ATTTTTCTTATCTAA	38
CATCATCCTTTTTAA	38
AATATTTAAATCCAC	38
CACATTTCAAATATA	38
TAAATTCCATTCCAT	38
TTATCTCTCCCATCT	38
TCTTTTAATTTCATC	38
ATTCCATTAACTTCA	38
CATCACTTTACTCTA	38
AATCTTACCTTCACA	38
ACTTATTATTCATAA	38
ATTAAATCATTACAT	38
AATCTAAATTTATCT	38
AATTACTTTAATTAA	38
TTTCCTCTCTAATTA	38
TCACATTTAATTTAA	38
ACTTCATATATTTCT	38
ATTCCTCTAAATTTA	38
AAACATTTACTTACA	38
TCCAAACTAATAATT	38
ACACTTTTCATCATT	38
AAATATCATATTCAT	38
TATAATACCTTTATT	38
CAACTATTATTCAAA	38
TCATTATTCAAAACA	38
TCTATAACCCACTTT	38
ACTATTTTTTTCAAA	38
TTTCTCATATTTCTC	38
TCATACTTATTCATA	38
CTTAACTTTCAATAT	38
AATAATTACACCTCT	38
TATCACATTCACTCC	38
ATCAATTTATTATTC	38
TACATTATTACATAC	38
TATCTTATTCCTTCT	38
ATCTTTCCTATTATT	38
ATTCATAAACTTTTT	38
CTTTTTTCTATAACA	38
ACACTTCTCTTTTAA	38
CAATCCTCTTTCATA	38
ATTCCATTTAAATAC	38
TCCATAATTTTTTAA	38
CTAACACCATTTTTC	38
CCTATTAAATCTTCC	37
CAATTACTTATTAAC	37
ATATTCTATTAACTC	37
ACTAATCATTCTTTT	37
AAAACTTAATATCCC	37
TATCATAATTCTATA	37
AATTATCATTCACTA	37
TAACATTTTACTCAA	37
TTTCTATTTTAACCC	37
ACACTTTCATACTCA	37
TATTCATTTATCTCA	37
TACATATTTAATATT	37
ACAATCTAACTTTTT	37
TTATCTTTCTAAACT	37
TATACAAATCTATTA	37
AACCTTATTCTATTA	37
ATCCTATCTTTATCA	37
TATTACAATTAACTT	37
TTATACATCCTTTAA	37
CCTTAACTTTACTAA	37
TAATCCCCTATCCAA	37
TTTCATCCTCATTTT	37
TTCTTTCCATCTTAA	37
ATTCTTTACTTCAAC	37
TATCTTTCCTTTTTT	37
TACAATACAAACCTT	37
TCTTATCCTACAATT	37
TTTCATCCTTTATTA	37
ATCTCTTTTTAATTT	37
TCACCTTTACCTTAC	37
CTAAACTTAATTTTT	37
TATCTTTACCATTAT	37
ATTCTCACATCTATT	37
TTCCTCCTATACTAA	37
TCTTCTTAATTAAAT	37
AATTCCATTTACAAC	37
TCATACATATATTCA	37
CACTTCACACTACTA	37
AAATAAACATAATAT	37
ACTATTATTTCTTTT	37
TCTTATCAATAAACA	37
ACACCCACATTTTCA	37
TTTTACTTCCACCCC	37
TCAATCCATAATAAA	37
TAAACTTAACTCACC	37
AATAACATTAACTCA	37
TATCATTAACCTTTT	37
AACTACTCTATACTA	37
ATATTTAATTTACTT	37
TTCATTTTCTATCTA	37
CTCTTAACAAATATC	37
ATACTCATCTTATTC	37
ATCAAAACTTTTTAT	37
CTTAATATTCTCTCT	37
AACTTACACTCAAAC	37
TTTTTCCATAACCCT	37
TATTACTCCTCTTCC	37
ACTTTTATAATTAAA	37
TATTCACTTTCCTAC	37
TATCCTAATTTATTA	37
TTCTATCCCTCACAC	37
ATTTTAATTCTTTAA	37
ACAAATTTTTCAAAA	37
TTCATACTCTCACAT	37
TTCAATTTTTACTTC	37
CACTTTTAATCCTTC	37
TACAATATCTCTTTT	37
AATAATAAATTTCCT	37
AATTTAATCCTCTTT	37
ATCCATTCTTCTCCA	37
CTCAAAACTTTTTTA	37
ATATTTAATCACATA	37
TATCCATCTTTACCA	37
ACATATCAACAACTT	37
TCTTCTACTCAATAC	37
ACACATTTTAAATTA	37
CCACAAAAATTTTTC	37
CTCCTTATCTTATCT	37
TATATTTTTACTCTA	37
TTCTTATTCTATCCC	36
CCTCTATCTCTTACT	36
TATTTAATCAATTAA	36
TCTTATCTATTTTCA	36
TCATATTTATACACA	36
ATTATCAATCTCTCT	36
CCATCTAATCATCTT	36
ATCTATAATTAATTC	36
TCTTTAACATATTTA	36
CATATTATCAAACAT	36
CCTTATTCTCAACCC	36
TTTCTATACCTCTAC	36
TCATTAACCACTAAT	36
AATTTCATACTTTTC	36
CTTCATATCTTAAAT	36
AACTTATCATTAATT	36
TCACCATCTACTTTT	36
TTCAATATCCATCAT	36
ATTTCTTATTAACTT	36
CTACACCTAATCATT	36
TTCATACCAACTTTA	36
ACTTACTCACTATAT	36
TCAATTTCTATTCAA	36
ATTAAACATTCAAAA	36
ACAATTCTTTTTTCA	36
TACTATATTACAACA	36
AATCTCACCACTATA	36
TCACTAAATTATTTC	36
AAATTTTTCACATTT	36
TTCAACCTTATACAT	36
TATATCTCAATTCCA	36
CAAAAAATACATTTA	36
AACACATTCTTATTT	36
TAAAATTTAACTTTT	36
AAAATACTTTTTTCT	36
TTACATCCTATCATA	36
CTATTCAAATATACT	36
TAATTCTTTTTTCCC	36
AAATCTAATATTATC	36
TAATAAATCTCCATT	36
TCCTTTTATAACCAC	36
CTCATCCTTATTTTT	36
TAATATTTTTCCTCA	36
ATCTCTATTAAATTT	36
CATCCTTTTAACTAA	36
ATCCTTCATTCACCC	36
TACTCTTTAACTCTA	36
AAAAATCATATCTTT	36
CTATTTACAACTATC	36
CTTCCTACTATTATT	36
TTTTATCACTATCAA	36
CCTTCTCTATCTTAC	36
ACTTCTTCTATCTTC	36
TCTTTCTTAATATAT	36
ACTTCTAAATTACCC	36
ATTCATATAATTTCT	36
ATTTCTCCATAACCT	36
TTTTATCCATTATAT	36
TCTTACCTTCTAATA	36
ACTACACTTAAATAT	36
ATATCTCTAAAATCT	36
ATCCTCTTATCAATT	36
TCCAAAACTTTCAAT	36
TCTATTATTAACTTA	36
CAATTTTACATTAAT	36
CTCATCCATTTTTAT	36
TACAAATTATTCTTC	36
TCCAATTTTCTCTCC	36
TTTAACTTCTCTCCA	36
ATCAATATTACATTT	36
CCTCACTCATTACCC	36
TACTTTTTAACCTCC	36
ACCAATCATCTTAAT	36
CTACTATTTTCAAAC	36
AATATTTCTACAATA	36
CCCATTATTTTATAA	36
TCTTTTTACTAAATA	36
TACCAACTCCTTTAA	36
TTATCTTATTCTTAA	36
TTCTTCAATTTCAAA	36
TTTTATCACTCTCCA	36
TCTAACAACTTAAAA	36
CTCCACATTTATTCT	36
CTCACCTTATTACAA	36
TATCTTTTAAACTAA	36
ATAAATAATACTTCT	36
TTTACTACAACCTTA	36
TTTCTCCTTCCAATC	36
TTCTTTCCATACTTA	36
TTATCAAAACTCTTT	35
TTTCCTCTCATACTC	35
TATCTTACACTATCT	35
ATATCTCCTTCTATC	35
TTCTTTCATATACCC	35
TATTTTCCTTATCTC	35
TTTCCATTATAATAT	35
CTTCACCCATATCCC	35
AACCTCTTAATTCTA	35
TAATATATCTAACAA	35
TCATTTTCTAAATAT	35
CCTTTACAATCACTT	35
TTACATTTATTCCCC	35
TACCTTATTCTCACT	35
ACAAAATAATAAATT	35
TTCCAAAAACTTTCT	35
TACTAAATTCCCATT	35
CCTTAACCCAAATTA	35
TCTACCTTAATATCA	35
ATAAACTTCTCAATT	35
TCTAACTTATAATTT	35
TACTAATTTCTCTTT	35
ACTTTTCTCTACCCA	35
TCCATAATTAACTAT	35
TTATTTTACAATCAT	35
CCTTTTATACCCTCA	35
ATCATTAATTATTTC	35
ACTTTTCTCACTCTT	35
CTCTACCCCCTATTC	35
TAACTACTTTTTATC	35
CATATTCTATTTACA	35
TCAAACTTTCTCATA	35
TTCTACTCTCTTTCT	35
TTTTACCCCTTTTCA	35
CACTATTTATTATAT	35
CATCAATTCATTCAA	35
CAACTCTAATAATCA	35
ATTCCTTTTACCTTT	35
AATCTCATCCTTTTT	35
ATCCATCTCAACTAT	35
TTTATTCCACAATCA	35
TATCTTACATTATTC	35
CTTTACTATAAATAC	35
AATTATTCTACCCTC	35
ATCCTCAATTCAACT	35
TCTTTTTTTCTCATC	35
ATTTATTTTAAACTT	35
TTTTCTCATCCACTT	35
TTACCTTTTCTCACT	35
CTTTAACTATCATCA	35
TCCAAACCTTTATTT	35
TTTTACTACTCCCTC	35
ATTACATACCATTTT	35
ATTTCCTCCTAATTT	35
ATTCCTCTCACTTTA	35
TTTAAATCTCAACTT	35
TCAATCATACTTCTT	35
CCTCTTATATCTCTC	35
ACCATTTTTCATCAT	35
ACATATAACATTACC	35
TACATTCTTAAAAAA	35
ACCTTACTTTCCCAT	35
AACTTTCCTTTCCAT	35
TTTTATAATCACATT	35
ATATTCTTCCAATTT	35
ATATCCTTTTTCTCA	35
AACTTTTTACATTTA	35
TTTAACCCTATCCTT	35
TTCTTCTAATTTCAT	35
ATACTTAACATCTAT	35
TACATTCATATCCTC	35
CTTAACTAACCCTAA	35
TTCTAACCATAATCT	35
CACTTCTTTTTTACA	35
TACAATAACATATTT	35
TAACCTATACTTTAA	35
ACTTTTCCAAATATT	35
TAATTACATACATTC	35
ACTATCTCATTTTAA	35
TATCCTACTACTTAA	35
TCATTCCATAAATAA	35
CTATTTTTAAAATAT	35
ATTTAAACCTCCTAA	35
CCTAAATTAATACTT	35
TACTTCCATTTTAAC	35
TTCCCTTAACATCAT	35
TCTACTTAAACTCAT	34
TTTTTTCCATAATCT	34
TTTTATAAATTTACT	34
TATCTTTATCTTCTC	34
TCCATTCTATTTTCC	34
CAATCTAATTATAAC	34
CCATCTCTTTTAAAA	34
AAAATCCTTTCTCTA	34
TTTCATCTCTTCCCC	34
TTTAATCCCATACCC	34
ACTTAATCATTAAAC	34
CAATATCCATTCACA	34
TTCATCTTCATCCAT	34
ACCAACTTAACTATT	34
ATATAATTAATTAAA	34
TCTCCACAATTAAAT	34
CCAATTTTATATCAC	34
AATTTTTTCTTTCAT	34
ATTTTTCTTAAATAC	34
ATATCTCTAATAATA	34
TTTTTATCTTCTCCA	34
CATTTTATATTTCCA	34
TATTTTTACTTCACA	34
CACATACTTTTCCTT	34
TAACTATAACTAAAT	34
ACTTAAATACTTCTT	34
TTTTTTATATATCCT	34
CCAATCCTTTATCTC	34
CATCACAATAATTCC	34
ATCCCAAATTCTTAT	34
TTCAATATCTTACAT	34
CTATAACTTTTTATC	34
TTACATCCCATATAA	34
CTTCCTTTTATTCAA	34
CTTACTTATTAATTA	34
ATACAATTTTTCTTT	34
CTTATCAATAATATT	34
ACAACTCAATTATAT	34
AAATTTCTCAACTCT	34
ATACAACTACAAATT	34
ATATCAACTTTTTAT	34
TATTCAATCACACTT	34
ATATTTTTTAATCCC	34
ATCATACAAATTTTC	34
CTCAACTCTTTTTTA	34
ATAATCCCATATATC	34
CCATTATTTATTCTC	34
CACTTACTCCATCTT	34
TCTTCAACCTCTTTT	34
ACATTATTAATTTAA	34
ATAAAACTAAATATT	34
CATTTCTAATCTTAC	34
AATCTACCAAATTTC	34
CTCCTTTCATTACTA	34
CTATTAATTACCCCT	34
ACCCATCCACTCCAA	34
CCTTTTACATATAAA	34
TCTCTCTTCTTATTA	34
ACCACTCTCTTATTA	34
TTCTTCTATCATTCA	34
TCTACAATTTATACC	34
AATTCATTCACTTTC	34
ATTAATATCAATCTT	34
AATTTCTCTCTCAAA	34
ATAATTATCCAATTT	34
CAAACCTATTAATTA	34
TTTATCTCAACCATC	34
ACTATATTCTTTTCT	34
ACAACTACATTCACC	34
TTCTTCTAAAATTTC	34
CTTCAATTTAATCAA	34
ACTTAAACTTTTTTA	34
CTTTTCATTTTACCC	34
TCCAAACAAATAATT	34
TTTCTCTAACATCTT	34
AACAAATTAACTTAT	34
TCACTTATAATCATA	34
ACAATAAATCTTTTC	34
CTTCACCTCTCATTC	34
CTAAATATATATTTA	34
CATTACTACACTTAA	34
CTAAATCCATTATTT	34
AAATTTATTACAACA	34
TCTAATATCTCCTTA	34
ATTAATTTCAATTTT	34
TTAACTTTTATATCA	33
CTTCCTTATTTTCTT	33
CCATACTTTTTTAAT	33
CAAACTACTTATTAA	33
CATTTATAAACATTT	33
ATTATAACTACTTAC	33
AATTTACCATAATTA	33
AATTCTCAATATTTT	33
ATAAACCTTTATACT	33
CCAAAAAATTCACTC	33
AATTTTCTCTCTTAT	33
ATATTTTATACCAAA	33
CCAACAATTTACTCA	33
ATTATCAATTTTAAA	33
CTATTATAAAAATAA	33
TTTCATAACCTCTTT	33
TCTATTATTCACTTA	33
TCTTATACACTTTAT	33
TTCCACTTTACTTCC	33
CTTTTCTCTTATATC	33
CCCCTTACATACTCA	33
TTTTTTTCTCCCACC	33
TCATTTAAAACTATT	33
CTTCACATTACTCTT	33
ACCATTTTACCTCCA	33
ATTTTACAATACTCT	33
ATATTTTACAATTCT	33
TTTCCCCCTAATCTA	33
CTTCCTATATCTAAA	33
TCATAACTTACTTTT	33
CTACTTCTATAAACT	33
ATATATTTACTCACA	33
ATAATTCCTCTTAAA	33
TTATATCAAATTTAC	33
TCATTCTATCATTCA	33
TTATTTAACTAACTT	33
TCTACACCTTAATAC	33
CATCTTTACATTACA	33
AAATAATTTACTCTA	33
TTCCTACAATAAACT	33
CAATATATTTACTAT	33
TTCTTTCTTCAACTT	33
ACTAACTTCTTTATT	33
TCAACAATTACTTAC	33
AATCTTTCTTTTAAA	33
AAACTTTTCAATTAA	33
TCATATTCTTTTTCT	33
TCCCACATCTAATTT	33
ATTTTTACAACATAA	33
TTCTTATATTACACT	33
CCTTTACATAATTCT	33
ATTAAATTTTTCCAT	33
ATTATTTACAATCAA	33
TTCTTACCTAATTTA	33
TACCATTCCTCTTAA	33
TCAAATATACTAATT	33
TATCTTAATACATTT	33
TTACTTTTAAATTCC	33
TCTTAACCTATTATT	33
CCTTTAACATACATA	33
TACCTTTTCAACTTA	33
AAAATTTTCTATCTC	33
TACAACCATTTATCC	33
ATATACTTCATTTTC	33
ATTTTTCCTATTTTA	33
TCCTTCCACTTTATT	33
TATTTCATCTTTTTC	33
AATCCCTACATATTA	33
TTCTAAATCATACAC	33
CACATTCAACCCCAT	33
CTCAATATTTTAAAC	33
TAATAAACTATTTTT	33
TTCTAACACAAAATT	33
TTTATATCATTCACC	33
ATATCTTCATTTCAT	33
ACTTCATTTTTCATA	33
CAAAAATTTTTAACC	33
AAATTTCTTCTCCTC	33
ATATACTCATACTTC	33
CACATCAATTCACTT	33
TAATTTAACATTTCT	33
TTTTCCTCCACACTC	33
AAATTTATTCCTTCC	33
ATTATCTCAATTATT	33
CATAAAACAAATATT	33
CATTTTCACTTTTAA	33
TACATTTTTAAACTT	33
CTCTTTAAACTTACT	33
TTACTACATCCCCAA	33
AATACAATACTTCTT	33
AAATAATATCTATTT	33
ACTTTTACATCACAT	33
CCATTTATCTTCTAT	33
CCCATCTTATCTTTC	33
CAACTTATATTAATT	32
TATCTTTACATTACC	32
CTTTATATAAAAATC	32
CTTCCATCTATTTTT	32
AAATAAATTAAAATT	32
TTTTCAACATTCTCC	32
TTCCTTTCTTTCAAC	32
TACTATTAACCACAT	32
TCTTTCACCTTATCC	32
ACAATTAATCTATTA	32
ATCAATACACAAATT	32
CTATTTCTTATCATC	32
TAATCATCTCTAAAT	32
TCAAACTCTTAATAC	32
TCTTTATATCTAATA	32
TTACAATCCATACCT	32
TTTATAACCATAACT	32
TTCTTTTCTCATCCA	32
TATTACAATAATTTA	32
TCTTTCTCCCACTCT	32
TTAATATCTAACTTT	32
AATCCATTTTTCACC	32
TATCATAATCCCTAT	32
ACTCCCTTATTAAAT	32
TTCTACAAATCATTT	32
ATAACTATATCATAT	32
TCATCTTTAATACAT	32
ATTCAACCATTTTCC	32
CATTTACCAACTTAT	32
TTCCTTTCATTACTA	32
TTTACATAATCCTAC	32
CTCTAATCCATATCC	32
ATACAATATTTCCTA	32
CCTACCTCTATCTTA	32
TCTTATCCTTTTATA	32
CCTCTTAAATTTTTA	32
TACAATACTAACAAA	32
ATTTCTTTCCTTTAC	32
AACTATATCCCCCTT	32
TTTTTACCTAACATT	32
ATTTTCTCAACCTTA	32
TTACTAATAACTCAA	32
AACACATTCATTCAA	32
AAAAATCTTTTTCCA	32
ATTACACCTTTATAA	32
CTCCATACTACACTT	32
CTCTATTCTAAATTT	32
TACTATACTAATTAT	32
AAATTTTATCTCCTT	32
TATTTCTTAATCTTC	32
TACATATTACCTTAC	32
ATAATATACCATTTC	32
AACTTCAACTTTTCT	32
TTCTAAAATATTTTT	32
TCATTTCAATCTCTC	32
TTCCTTTTTACACCC	32
ACATTACTATCATCT	32
ATTTCTCATATCACT	32
CATTTCCAATTTTCT	32
TACTCCTATTTTTTA	32
TTTAAATACATATCT	32
ATTATAATACACTTT	32
TTCTATTTATACTAA	32
TACCATTTACCCTAT	32
ATTTAACTTTCTCTA	32
ACTACTAATCTTTTT	32
AATCACATTTAAACC	32
CACATCTCTAACTAT	32
ATCATAAAAATTTTT	32
TTATTCTATCACAAA	32
TAACTTTATTAAAAC	32
TAATTATCTTCAAAT	32
ACATCAATATACTAT	32
ATTTCAATCCATTTT	32
TACTCATTTTCAATA	32
ATTACCTACCCTAAA	32
AACAATTTCCTCAAT	32
AACTCTTAACTTACT	32
TTCCAAAACTTATTC	32
AACCCTACAATATCT	32
ACTTACTAATCTTCC	32
CTAATTTTAAACTCA	32
ATACATAAATTCACT	32
TCTCTTACTTTTCAA	32
ATTTTATTAACAAAC	32
TACTACTTCATCTCA	32
CTATCTATTTAACCT	32
AAATAATCCCCTTTC	32
ACTAAAATTTCTTAT	32
CATTCCTCATATTTA	32
ACTTCATATAAACAA	32
TTTATTAAATAATTC	32
AACTATATTCTAATT	32
AATTCATTACAATAC	32
TTTTACTAAAACTTT	32
TCATTCCTTTAATTA	32
ATCACTTTCATCTCT	32
CTTCCTATCTTTTTC	32
AATTTTATTCTTCTT	32
TTTCAATTCCACAAC	32
TTCACTATCTATTAT	32
AAATATTCACTCTCA	32
TTAAATCTATCAAAT	32
TATCCTATAATTACT	32
TATTAAACTCTTTTT	32
TATTTCTTTTATACC	32
TACACATCTCTACTC	31
TCATACTCTATTAAT	31
TCATTCTTCATTAAC	31
TTTACATTCTCAATC	31
CTTATATTTTCTCTA	31
AACTCTTTTAACCCT	31
AACATTATCTTAAAT	31
ATTAATTTCCTTCCA	31
ACAAATTCTTTTTTC	31
TTTACTACATCAACC	31
CTTCTTTTATTATAA	31
TACACTCTATTATTT	31
ATTAACATAAACTTC	31
TAACTCACTCTTTAA	31
TATTCTCTACATAAT	31
ACTTTTACCACAATT	31
ATCTTTTCTTCATAT	31
ATCCCATATTAACCT	31
ACTTCCTTATCAACT	31
TTTCTTCTATTACAC	31
ATACTTTATTTAAAT	31
TTATTCATATATCTA	31
CCTTCTTATTATACT	31
TCTAATTACATATTA	31
AACATATCTACATCT	31
TTCACTCATATTTAT	31
AATCACTTATTAAAA	31
ATTTTATTAATATCA	31
ACTCTATTTAAAATA	31
CTTCATTATATTATA	31
TATTTAAAACTTCCC	31
ATTTCTTCATTAATA	31
ACACAATCACTTTTT	31
ATACATTCTTACTCC	31
CAATTATAACAACAA	31
CTTAATAACTCCCCT	31
TATTTTCACCCAAAA	31
ACTTCTTTAAATTTT	31
ACAATACACTTTTTT	31
ACTCCATTTTTACTC	31
AACATATTTATTCCA	31
ATAATCTTATTAAAA	31
TTTATCTAAAAACAC	31
ATTATTCTACATTTA	31
AATAAACTTTCTTTT	31
AATTTATTTCATCTC	31
ATATCTCTTATTTAC	31
AAATTTTCTATTCTA	31
AATTTTACACTTATC	31
AATCCTTTAACATCA	31
TTTTTACCAATTAAC	31
TTCTCTATTTCTTTC	31
CTTATAACACCCACA	31
CTTTCTATAACCATT	31
ATACACTAAATATTT	31
CTCATCCAATCTATC	31
ATTTCTTTTCCTACA	31
CTACTAATCCCAATA	31
CCACTTCTCTAACTT	31
TCTATTTTCCTTTAT	31
TAAATTACTAATCAT	31
AATCTAATATACCCT	31
ATTTAAACATTTCTT	31
CTTCAATCTTTATCA	31
CATCCTTTCTTAAAA	31
TAACTAATTTTATTT	31
CTCCTAAAATTCTTC	31
TCTTTTTCCTTAAAC	31
TATCTCTACTTTCTC	31
TTTATTCTTTTTTAA	31
AAATCCATTATTACC	31
TTTAACCTTTTAACT	31
TCATTCTATTTTTCC	31
TATAATATACTTTAA	31
TCATAACATTTTCCT	31
TACACCCATAAATCA	31
CTACCTTATTATTCC	31
ATTTCCTTCATTTCT	31
CTTATTCAAAACTCT	31
ACATAAATTACTTAA	31
TTACTCTTACTTTCT	31
CTCTAAAAAAATCTT	31
CTTACAACTAATTAC	31
TAACCTTTTTTCCTT	31
CCAATATTTTTATCT	31
TAAACCTTAAAATAT	31
TTTCTCAACAAATAC	31
TCATCCATACATCTT	31
ATTTTTATCTTACAT	31
CAAAAATTTTTAAAA	31
TTCAATTTCATACAT	31
ATATATAATTTTTTA	31
ATTTCATATACTATT	31
AATATAATATTATAC	31
CTCTTCTTCTTCCAA	31
AAATTTCCATCCTTT	31
TTAAATCTAAATTAC	31
TCACCACTCCTATTC	31
TCTTTTCAATACCTC	31
ATACTTTTTCCTCAT	31
TAAATTATTCTAATT	30
CATCAAATTTCTAAC	30
AATAATATTACATCT	30
CAATTACAAATTTCC	30
TTAACTCTTTTTAAA	30
ATAATCTATTACTAA	30
CCCACACTTTATCAC	30
ACAATATCTCATATA	30
TTCAATATACTCTTA	30
TAAATATACTAATAA	30
TAACATTAAATTATT	30
TTAATTAAATATCTT	30
ATATCTACTATAATT	30
AATATCTTTTATCAA	30
CTTCCTTTCACCTTT	30
CTCAATTATCTAATT	30
CAATATAATATTTTT	30
TTCTAATTATTAATA	30
CCTTAAAATTTCAAC	30
TTCTATTACTTTTTC	30
CTTTAATATATCTCC	30
AATCAATCATTTCTT	30
TCCACAAAAACTTTT	30
CAACTTTTACTTATT	30
TTCTTTTTCTTCTAC	30
ATACCAAAATTTAAC	30
TTCATCTTTATACAT	30
TTAACTTTAATTAAA	30
TTAATTCTATTAACA	30
TACTACCTTAACTTT	30
TCTCTAATATCATTA	30
CCTACTCATTTTCAA	30
TCTAATCAAAATTTC	30
AATCAACTCATCAAT	30
TTTATCACCTTTTTA	30
TATATCATTTCCACT	30
AATAAATCTATAATT	30
ATTTAATTATCTCCC	30
AATCCTTCATATTCC	30
TTCTATCTTAACAAC	30
AAAACATATTTATAA	30
CAAACTTTTATTTTA	30
TTTTATCTACAAACT	30
TAAATTTTTATACCT	30
AACCTTATTTTTTAA	30
TCTTTTTTTCATCTC	30
TAAACTTTATCCAAC	30
ACATCATTATCCCAA	30
CCCATTTATATATAA	30
TTTTAATTCCTTATA	30
ATTTAACCATTATCA	30
AATTTACCATTTTAA	30
TCTCTCCCATTTTTT	30
TATTCTCTCTTTACA	30
TCATCTATTTTATAA	30
TTCTACTACCATCTC	30
TACTTATTTCCATTC	30
CTTACTCCATTTCTA	30
AACATTTCAATTATT	30
CACAATTAATTTTAA	30
TATTCTATATCTCCA	30
ACAATTATTTTCTAC	30
ATAACAATTTTAATT	30
CCCAAATCTTTCCTT	30
CAATCATTCTTTAAA	30
ATATTTCTCCTCATT	30
TCCATTCATTCAAAT	30
ATTTCATTCCACTTT	30
TCTATTTTTCCAAAA	30
CTATACACTACATTC	30
TTCAATCACTAATTT	30
CCAAAACTAATTTTT	30
AAAACTTCACTTTAC	30
AAACCATATCTTAAA	30
TCTACTCATATATTC	30
CTCAATTATTTATAA	30
CTAAATATCAATACT	30
TTTCAAATAATCCAA	30
TTAAACATAACTAAA	30
ATTTCCAACTTTTCA	30
TTTCTTCCATAAACA	30
AATCTCCATTCTTTA	30
TTTTTCATACAAATA	30
ATCTACTTAAAAACT	30
ATATTATCTACTTTC	30
CACATCTTAATTTCA	30
TCATATTTCTAATAA	30
CTTTTTCCCACACAA	30
TTTTACTAATCAAAT	30
CCCTCAATTCTTTAA	30
CTAATAATTTTCCTA	30
ACCTACTCATAATTT	30
TCTCATACACTTCTT	30
CTTTCTACTTTAATC	30
TTCCAACCTATTCTT	30
TTCAAATACCTTTAA	30
ATCTTCTACCTAATT	30
TAATAAAACCCATTT	30
CTCTTTTTCCATCTA	30
TAATATTAACAACTA	30
CCTTCATCTATAATA	30
TCTCATTCTATTTTT	30
CACTTATAAACATTC	30
ATAAAACTTTTAATC	30
TAATCTTCTTTCACC	30
TTTATATTCTTATCT	29
ATTACTTTCACTACC	29
ATTTTACTCCTAATA	29
TCTTAAAAATCTAAT	29
ATCACATTTTTTATC	29
ATCCTTTAAATTATT	29
TAAATATACTCTTAC	29
CTAATACACATACTT	29
TTACATATTCAATTC	29
CTCCCTCATCCTAAT	29
TATCTCTTTAACCTT	29
TTTTTTCTTTCAACT	29
CACCAATTCCTTTCT	29
TTTTTACCTCTACTT	29
AATCTCTATATATAC	29
CTTTTTAATAAACAT	29
ACTTTCAACACATTC	29
TACAACAACTATCAT	29
TATTCTTTTCTAATC	29
TATCATCTACACTTA	29
AACCAAACCAATTTC	29
ATTATCAACTATACC	29
CTAATTAATATTCTT	29
TTAACATCTATTTTT	29
ATATCATCTTCATCC	29
CAATAATTTACTATT	29
CATATAAAAAAACTT	29
TAAACATTTAATAAC	29
TTTCTTAATTACCTT	29
TAAATTTTTCCTACC	29
TTTAATCTCACCTCA	29
CCAATTACTCACATT	29
CATTAACTATTTAAA	29
ATCTTACTCCTCTTA	29
TCCCATCAATTTTAT	29
CTATATCATAATTTT	29
CTCATTCTCTTTTTA	29
TAACACTTAATTTTT	29
TTACACAAATTTTTT	29
TTCTTCCATTACTCT	29
TTACTATTCCAATTA	29
AATTCACTTTTCTCA	29
CCAATCTATTCAATA	29
ATACACTATACAATA	29
ATTCATTCTCAATAT	29
ATATAAAACTTTTCT	29
TATATACTTAAATTT	29
ACTATTTCATCAAAC	29
CATACCTTTTTTTCT	29
ATTCTTACAATTTTC	29
TATACTACAATTAAA	29
TCTTTCACCTTCTCT	29
CCTATACATTCTATA	29
AAACATTACAATTAT	29
ATATATTTAAACTAC	29
TTTTAACATCACTTT	29
CCTTTTTTTAAATTT	29
TTACATTAATTTACT	29
TTTCCCAATCTCTTT	29
ATTCTATTCCAATAA	29
TACTTATTCTCTATT	29
TCATATTTATTCATA	29
TTTCCTCACTAAATT	29
CTCATCCTTTTTTAC	29
CAATTAAATCTATTA	29
TCATCCTATTTCATT	29
TAATTTATCCCTTCT	29
AAACATATTTTTAAC	29
TCCCTTTTATTCCAC	29
CACTCATTTTAATTA	29
CATTCATCATTCTTT	29
AATTCTACTAATCAA	29
CAAATTATATCATCA	29
CAAATATACCAACTT	29
ACTATTTTTTACATA	29
ATCTTACATATCAAT	29
TTACCACTAAATTCC	29
AAATAATACTTATAA	29
ATTTACTTCTCCTAC	29
TATATCCTCAATAAA	29
CATTTCTACTCTCCT	29
ACTATTTATATTTCA	29
ATATTTATTTCAACT	29
ATATTCTAATCTTCC	29
AATTTCACTTTTCAT	29
ATTATATTTTCCTAA	29
AAATAACTTTCATCA	29
TTAAAACCTCTTTAT	29
TTTATTCCACTTCTC	29
TTAATTCCATCTTTA	29
TACCACTTTTATTTT	29
TAATTAACCTACCCT	29
TCATTACATCTATAC	29
TCATTCATAAATAAA	29
CTCTATTAACATTAA	29
ATCTATTCTTATTAA	29
CTACCATATTTTTAT	29
TACTAATCTATTTTT	29
TATATACACATAACC	29
TAAATCTATTAAATT	29
ACCTCTACATTTTTA	29
TTCATATTTTCCACC	29
CTCACTTTTAACACA	29
TCCTTTTTTTCAATA	29
ACCACATATCTTTAT	29
AATTTTTTTCAAACC	29
TCTTACCTCACAATC	29
AACATCTTTAATTAC	29
CCCAACATTTTTTCC	28
CTCTCAATTTACAAC	28
TATATACTTAATTCC	28
TACTCTCTTAACAAC	28
ATTTTACATACCCCC	28
TACTTCACTTCTAAT	28
AATTACTTATTAATT	28
TTTCATTACACCTAA	28
ATACCTTAAATTTTA	28
TTTAAATTCTCCTCA	28
CTATCTACTTTATCC	28
CTACTTTCTTTTTAC	28
TTTCACTTCAATTCT	28
TTCATTTCACTCTCA	28
TTTTCTATCTATATT	28
ATTTATCTCTCAATA	28
ATACTAATACTTCTA	28
TTTTAACTCTTCAAT	28
TTAATTTACTTACAA	28
AAACTAATTAATTTC	28
TTTCAACTACTTACC	28
CAATTATTTCTATTT	28
TCACATTATTCATTA	28
TCCTCAATTCTTCCT	28
AAATTAATCCTTTTT	28
TCATCTTCAATACAA	28
CTTTTCACCTACTAA	28
AACATTTCTTATTTT	28
TCACTTTAATTTCCA	28
CTTTTACAAAACTCA	28
CCTCTTTATTATCTT	28
AATTCCACTAACTCT	28
TTTTTTTCAATTACA	28
TTCTTATTTCTCCCT	28
ATCATTAACTATTTA	28
AAACTATTTTTAAAT	28
ATCTCATACTTATTA	28
ACTTTAAATTCTATT	28
TTAATCTTTTAAAAA	28
ATTACTTATCACATT	28
TCATTCACCTTTTAT	28
ATACCAACCCTTTAA	28
TTTCAACACCTATAC	28
TCTAATCCTTCTTCT	28
CTTTACAACTTTATT	28
ATAATTAATAAATTA	28
TTAATTAATCTTTCC	28
ACTCTATCCTTACAA	28
AATATTTAATCTATT	28
ATTTCTTCAAAATCT	28
ATTCTTCAATTCCTA	28
TACTTCATCACATCT	28
ATTATAACCTACTCA	28
CAACTCTCATTTTTC	28
TTACTACCTTCTAAT	28
CTCTAACCTCTTACA	28
TAACACATAATTTAA	28
ATTACTCTATCCACA	28
TCCCTTTTTTCAAAT	28
ATATTTTCATAATAA	28
TATACCTTCACCTTT	28
TTACTACTAATCAAC	28
CTTTCCTACCTTTTA	28
ATCTCATTAAACTTT	28
TTATTTATCCAAATT	28
TCTTATCAATTCCCA	28
ATTTTATTATCATAA	28
CTCTATCTTAATTTA	28
ATAAATTTTACCCTC	28
CCCTTTTTCCTAATT	28
TTATTTACCTACTAA	28
TTCATTCTCAACCTC	28
AAAACTATATATTTA	28
CACTATTCATTCAAT	28
TTTAATATAACACTA	28
TCCTATTATAAATCA	28
TACATATCCTATTTT	28
ATTATTTTCTACCAA	28
TCATATTCTTTACTT	28
TTTTCAATACCATCA	28
CTTTTATTTACAATT	28
ACAAATTATATCATT	28
CCCTCACATTCATTA	28
[truncated: 9,300 more rows]

## Sheet: Fig2
Fig. 2a
	CV
# of modules used	Random selection 1	Random selection 2	Random selection 3	Random selection 4	Random selection 5	Random selection 6	Random selection 7	Random selection 8	Random selection 9	Random selection 10	Random selection 11	Random selection 12	Random selection 13	Random selection 14	Random selection 15	Random selection 16	Random selection 17	Random selection 18	Random selection 19	Random selection 20	Random selection 21	Random selection 22	Random selection 23	Random selection 24	Random selection 25	Random selection 26	Random selection 27	Random selection 28	Random selection 29	Random selection 30
1	0.0438945	0.0266338	0.0080739	0.0435431	0.0490292	0.029995	0.023868	0.029995	0.017995	0.0390156	0.0235973	0.0472291	0.0390156	0.0200463	0.0324708	0.0490292	0.0306202	0.017995	0.0362933	0.0390156	0.012277	0.052923	0.0422858	0.0580151	0.0274498	0.0306202	0.0273249	0.0179477	0.0318624	0.0274498
2	0.0275724	0.0260465	0.0147402	0.0154268	0.038802	0.0142528	0.0144515	0.0313527	0.03124	0.0247649	0.0138218	0.031955	0.0298028	0.0336648	0.0180989	0.0378822	0.025253	0.0228483	0.0212803	0.021514	0.00883652	0.0315597	0.024953	0.0245829	0.0287186	0.0148403	0.0410079	0.0195985	0.0376539	0.0213627
3	0.0115739	0.0298015	0.00950265	0.0211915	0.0153797	0.0124472	0.0174168	0.0144568	0.0158366	0.0160983	0.0166325	0.0239403	0.0217258	0.0202343	0.0242452	0.0159374	0.029127	0.0118367	0.011687	0.0248397	0.0145023	0.0071089	0.0151661	0.0205253	0.0205154	0.0240069	0.0100815	0.0279192	0.0188681	0.0249509
4	0.00470931	0.0083585	0.0118459	0.0219373	0.0121582	0.0123386	0.00718265	0.0293148	0.0223063	0.00699194	0.0151819	0.0178043	0.00845543	0.0132602	0.0113771	0.0145285	0.0155225	0.00854431	0.00830889	0.0123429	0.0151714	0.00949163	0.0139508	0.0164748	0.00898207	0.0171045	0.00595214	0.0218498	0.0107772	0.0185192
5	0.00710945	0.01125	0.0130457	0.0133221	0.0205921	0.00982334	0.017476	0.00987077	0.0139377	0.00916732	0.00806431	0.0162345	0.0105549	0.0173287	0.0146633	0.0150983	0.0155742	0.00903351	0.00621167	0.0232693	0.0229653	0.00751181	0.0179066	0.0115665	0.0141668	0.00658951	0.0131249	0.0217625	0.019606	0.0155905
6	0.0160051	0.011695	0.00890807	0.00713993	0.0102124	0.0135308	0.0153547	0.0046753	0.012944	0.0127877	0.00923563	0.0124594	0.0169158	0.0143489	0.0179951	0.0117579	0.0114668	0.0203057	0.0141041	0.0154382	0.015084	0.0164196	0.0147217	0.0106774	0.0228705	0.00918718	0.0124709	0.0139415	0.0128005	0.0108998
7	0.00610174	0.0174175	0.0109219	0.0200677	0.020081	0.0108204	0.0104324	0.0120049	0.0209126	0.0147346	0.00404516	0.0151907	0.0150173	0.00514899	0.0118456	0.0148666	0.0084329	0.0145387	0.0197388	0.0102323	0.0233175	0.00782808	0.0160073	0.00453389	0.00549988	0.0200305	0.0112345	0.00843509	0.0108444	0.01219
8	0.0182646	0.0187551	0.00378872	0.0109751	0.0126777	0.0107743	0.0148044	0.0105214	0.0192425	0.0202937	0.0113097	0.00634975	0.011119	0.0075013	0.0125867	0.00798244	0.0149326	0.0120124	0.00911475	0.0192957	0.0118047	0.00938911	0.01739	0.0203679	0.00843114	0.0202511	0.0106428	0.0171001	0.00877739	0.0120184
9	0.0157914	0.0121046	0.019904	0.00656474	0.00909729	0.0129448	0.00964601	0.00626201	0.0160955	0.0125303	0.00912911	0.0130354	0.0231943	0.0174987	0.00319685	0.0114906	0.0125994	0.00906919	0.0120368	0.0111426	0.0131608	0.0170526	0.0164179	0.0121668	0.00891256	0.0155667	0.0141602	0.00500661	0.00830621	0.00842154
10	0.00901378	0.00803055	0.00683178	0.014869	0.0101293	0.00926709	0.0175394	0.0100803	0.0158975	0.00536317	0.0105567	0.0108994	0.0108392	0.0149109	0.0136432	0.00987646	0.0128595	0.00915524	0.0114821	0.00766334	0.0113266	0.0137167	0.00951287	0.0028114	0.0138022	0.0153182	0.0192077	0.0140936	0.0104459	0.0118769
12	0.0118382	0.00711948	0.0110937	0.0111639	0.00911895	0.0107004	0.0085433	0.0117117	0.0106596	0.00638844	0.0105774	0.00950792	0.00712296	0.00716453	0.00990188	0.012906	0.0116695	0.0129961	0.0103482	0.00316082	0.00862882	0.014527	0.00588217	0.00696522	0.00975601	0.0125526	0.0102635	0.00895681	0.00826097	0.00887937
15	0.0112426	0.00673032	0.0109555	0.00941206	0.0168445	0.0111357	0.00736931	0.0105101	0.00921227	0.011036	0.0095824	0.0104088	0.00652362	0.00943715	0.0138667	0.00574946	0.00831681	0.00774512	0.0126228	0.0147273	0.00751869	0.00768435	0.00536502	0.00847387	0.0160931	0.0125675	0.00639112	0.0101943	0.00636808	0.00945802
18	0.0114992	0.00663384	0.0116853	0.0133877	0.0155609	0.0133686	0.00609761	0.00483407	0.00997048	0.00794213	0.0125632	0.0085351	0.0076372	0.0082803	0.00477596	0.00855712	0.00920367	0.00473271	0.00793297	0.0118544	0.00952261	0.00595747	0.00807101	0.00987762	0.00767217	0.00756764	0.00714825	0.0114411	0.00979999	0.011863
21	0.0113624	0.00795535	0.0118356	0.00746607	0.00927679	0.00566691	0.0126666	0.00789032	0.00559663	0.0113476	0.0108624	0.0130361	0.00292386	0.00923574	0.0107413	0.00936133	0.0120516	0.0067616	0.0122445	0.00741556	0.00515996	0.00820015	0.00985355	0.0108025	0.0114823	0.00973962	0.015193	0.00535546	0.00695328	0.00684734
24	0.0127997	0.0107488	0.00804433	0.00940389	0.00903123	0.00785907	0.00867915	0.00694262	0.00681135	0.00927803	0.00783531	0.00527966	0.00878935	0.00855918	0.00921633	0.00854162	0.00726661	0.00798235	0.0102286	0.00595176	0.0112548	0.00936685	0.00789277	0.0067931	0.0124112	0.00569842	0.00831496	0.0071672	0.00963044	0.00599097
29	0.0121137	0.0118662	0.00535979	0.0102011	0.00702711	0.00678332	0.00571841	0.00683405	0.00943436	0.0121084	0.00662406	0.00839713	0.0061057	0.00485371	0.00786417	0.00550739	0.00902316	0.00833011	0.0043813	0.00666322	0.00952603	0.00663133	0.00933319	0.00530915	0.00676851	0.00670363	0.0105179	0.00565492	0.00568676	0.0102099
34	0.0069546	0.00671519	0.00874103	0.0108585	0.00710747	0.00661933	0.0066118	0.00764006	0.00562389	0.00463244	0.00928361	0.00795018	0.00690413	0.00800411	0.00833269	0.010167	0.00820093	0.00557614	0.00745677	0.00717859	0.00815547	0.0100146	0.00590242	0.00673808	0.00858608	0.00829408	0.00574083	0.00833171	0.00608362	0.0076879
39	0.00856856	0.00715186	0.00776877	0.00674134	0.00826195	0.00700419	0.00738389	0.00687042	0.00682024	0.00579784	0.0063633	0.00621588	0.00694396	0.00637783	0.00534493	0.00731183	0.0058009	0.0064202	0.00893775	0.00571772	0.00672041	0.00890493	0.00723019	0.0093202	0.00848021	0.0082886	0.00892335	0.00629951	0.0069314	0.00582183
44	0.00824546	0.00777527	0.00651254	0.00758701	0.00749504	0.00563757	0.00843204	0.00920323	0.00693825	0.00591293	0.00615347	0.00772231	0.00681326	0.00902373	0.00847447	0.00682185	0.00683447	0.00699359	0.00641483	0.00844687	0.00659265	0.00665619	0.00658489	0.00662738	0.00854393	0.00706391	0.00660833	0.00829686	0.00823557	0.00696594
49	0.00694605	0.00694605	0.00694605	0.00694605	0.00694605	0.00694605	0.00694605	0.00694605	0.00694605	0.00694605	0.00694605	0.00694605	0.00694605	0.00694605	0.00694605	0.00694605	0.00694605	0.00694605	0.00694605	0.00694605	0.00694605	0.00694605	0.00694605	0.00694605	0.00694605	0.00694605	0.00694605	0.00694605	0.00694605	0.00694605
Fig. 2b
		QASeq ploidy
2.05 ploidy sample	repeat 1	2.07964
	repeat 2	2.06498
2.00 ploidy sample	repeat 1	1.98715
	repeat 2	2.00245
	repeat 3	2.01231
	repeat 4	1.99809
Fig. 2c~e
	QASeq	ddPCR			IHC	QASeq	ddPCR
Sample	Ploidy	Ploidy rep1	Ploidy rep2	Mean	Status (pos=1, neg=0)	Status	Status
FF1	7.6317	7.0987	6.83147	6.96508	1	1	1
FF2	11.8337	12.306	10.9757	11.6408	1	1	1
FF3	1.88995	1.99738	2.0658	2.03159	0	0	0
FF4	1.93037	1.84396		1.84396	1	0	0
FF5	1.8472	1.78519	1.76354	1.77436	0	0	0
FF6	13.6641	13.6979		13.6979	1	1	1
FF7	7.74137	7.85912		7.85912	1	1	1
FF8	2	1.5365		1.5365	0	0	0
FF9	1.82926	1.98011		1.98011	0	0	0
FF10	1.47575	1.61265		1.61265	0	0	0
FF12	2	1.40669		1.40669	0	0	0
FF13	2	3.00643		3.00643	0	0	1
FF14	34.7582	36.9295		36.9295	1	1	1
FF15	6.91534	8.17771		8.17771	1	1	1
FF16	2	2.49864		2.49864	0	0	1
FF17	1.36886	1.75585		1.75585	0	0	0
FF18	1.47613	2.57741		2.57741	0	0	1
FF19	5.287	5.07485		5.07485	1	1	1
Fig. 2f
Plex #	Gene	Chromosome	FF19 ploidy	Healthy PBMC ploidy
1	ERBB4	2	2.12674	1.96323
2	ERBB4	2	1.86265	2.04648
3	ERBB4	2	2.29369	1.40296
4	ERBB4	2	1.96333	2.09794
5	ERBB4	2	2.0645	1.99837
6	ERBB4	2	2.11813	2.04649
7	ERBB4	2	1.90735	2.08672
8	ERBB4	2	1.90659	2.07133
9	ERBB4	2	1.81638	2.01465
10	ERBB4	2	1.19455	2.06396
11	ERBB4	2	1.69153	2.09362
12	ERBB4	2	2.13577	2.0936
13	ERBB4	2	2.02072	1.94275
14	ERBB4	2	2.12266	2.2017
15	PIK3CA	3	1.66129	1.83366
16	PIK3CA	3	1.51048	2.03929
17	PIK3CA	3	1.39772	2.00339
18	PIK3CA	3	1.45206	2.12676
19	PIK3CA	3	1.6776	1.98896
20	PIK3CA	3	1.62281	2.04773
21	PIK3CA	3	1.51059	2.018
22	ESR1	6	1.94577	2.22382
23	ESR1	6	2.06661	1.9753
24	ESR1	6	2.08961	1.79291
25	EGFR	7	2.00285	1.96893
26	EGFR	7	2.3066	2.02055
27	EGFR	7	2.09961	1.98246
28	EGFR	7	2.18451	1.88886
29	EGFR	7	2.01061	1.60332
30	EGFR	7	2.36231	1.97385
31	BRAF	7	1.99207	2.15193
32	BRAF	7	2.09811	2.01876
33	PTEN	10	2.27473	1.98691
34	PTEN	10	1.85867	1.99966
35	PTEN	10	1.94	1.99692
36	PTEN	10	2.08938	1.96532
37	PTEN	10	1.96717	1.89119
38	PTEN	10	1.92775	2.02216
39	PTEN	10	2.11919	1.88466
40	PTEN	10	1.67715	2.08458
41	PTEN	10	1.95399	1.71257
42	PTEN	10	2.06003	1.96462
43	KRAS	12	1.79657	1.88964
44	ERBB3	12	1.99715	1.95965
45	ERBB3	12	1.84388	2.05296
46	ERBB3	12	1.81247	1.92044
47	ERBB3	12	1.75464	1.94835
48	ERBB3	12	1.91211	2.10804
49	BRCA2	13	1.75659	1.91569
50	BRCA2	13	1.81892	2.09488
51	BRCA2	13	1.81165	2.04385
52	BRCA2	13	1.68249	2.03844
53	BRCA2	13	1.85631	2.10639
54	BRCA2	13	1.84512	1.9252
55	BRCA2	13	1.75371	1.80289
56	BRCA2	13	1.83219	2.06801
57	BRCA2	13	1.65903	1.98083
58	AKT1	14	2.00627	2.01869
59	GLOD4	17short	1.21821	1.97979
60	GLOD4	17short	1.29555	1.96584
61	GLOD4	17short	1.29181	1.99391
62	GLOD4	17short	1.30548	1.96526
63	CTNS	17short	1.14526	1.90421
64	CTNS	17short	1.37138	1.95402
65	CTNS	17short	1.50454	1.96542
66	CTNS	17short	1.46813	1.99583
67	CTNS	17short	1.55689	2.03719
68	ELP5	17short	1.65099	2.02481
69	ELP5	17short	1.54219	2.04382
70	TP53	17short	1.45512	2.0707
71	TP53	17short	1.44174	2.019
72	TP53	17short	1.56221	1.90976
73	TP53	17short	1.42083	2.15719
74	TP53	17short	1.37556	1.95512
75	TP53	17short	1.3056	1.96561
76	ELAC2	17short	1.521	1.99355
77	ELAC2	17short	1.40462	2.09711
78	ELAC2	17short	1.43675	1.96224
79	ELAC2	17short	1.34978	1.90119
80	ELAC2	17short	1.40294	1.95662
81	ELAC2	17short	1.42109	1.97693
82	COX10	17short	1.60051	1.89104
83	COX10	17short	1.44151	2.09117
84	TEKT3	17short	1.35541	1.9411
85	TEKT3	17short	1.4908	2.01193
86	TEKT3	17short	1.48663	1.94455
87	TEKT3	17short	1.50613	1.93612
88	TEKT3	17short	1.42926	1.85158
89	ADORA2B	17short	1.50141	1.86525
90	ADORA2B	17short	1.37574	2.06227
91	ADORA2B	17short	1.43714	2.11065
92	ADORA2B	17short	1.4569	1.92129
93	ADORA2B	17short	1.47016	1.9587
94	TRPV2	17short	1.32737	2.07412
95	TRPV2	17short	1.52806	2.02942
96	TRPV2	17short	1.43201	1.8769
97	TRPV2	17short	1.45093	2.06477
98	TRPV2	17short	1.35432	1.8573
99	FLCN	17short	1.44319	2.01654
100	FLCN	17short	1.45675	2.04794
101	ATPAF2	17short	1.37392	2.00235
102	ATPAF2	17short	1.4038	2.1034
103	ATPAF2	17short	1.30016	1.93811
104	ATPAF2	17short	1.45793	2.02064
105	ATPAF2	17short	1.45044	2.06922
106	EPN2	17short	1.53903	1.99875
107	EPN2	17short	1.47037	1.9225
108	EPN2	17short	1.37676	1.98054
109	EPN2	17short	1.38505	2.03065
110	EPN2	17short	1.39431	1.97514
111	DHRS7B	17short	1.53215	2.0025
112	DHRS7B	17short	1.41601	1.99908
113	ERBB2	17long	5.77703	1.90213
114	ERBB2	17long	5.23291	1.99779
115	ERBB2	17long	5.54822	1.9797
116	ERBB2	17long	5.5278	2.13145
117	ERBB2	17long	5.5452	2.03671
118	ERBB2	17long	5.287	1.97362
119	ERBB2	17long	5.7475	2.02379
120	ERBB2	17long	5.71485	2.15642
121	ERBB2	17long	5.15898	2.07713
122	ERBB2	17long	5.63013	1.81557
123	ERBB2	17long	5.78987	2.06581
124	ERBB2	17long	5.70837	1.99523
125	ERBB2	17long	5.48965	2.0746
126	ERBB2	17long	5.36828	2.03168
127	ERBB2	17long	5.97392	2.08872
128	ERBB2	17long	5.90469	2.03142
129	ERBB2	17long	5.78374	1.9201
130	ERBB2	17long	5.49432	2.0129
131	ERBB2	17long	6.51896	2.21627
132	ERBB2	17long	6.13961	2.15623
133	ERBB2	17long	5.83057	2.1189
134	ERBB2	17long	5.53794	1.93774
135	ERBB2	17long	5.08989	1.98674
136	ERBB2	17long	5.54013	2.1777
137	ERBB2	17long	5.8314	2.03473
138	ERBB2	17long	5.45733	1.80972
139	ERBB2	17long	5.53979	2.05545
140	ERBB2	17long	5.48335	2.01778
141	ERBB2	17long	5.01812	1.93126
142	ERBB2	17long	4.70709	2.00228
143	ERBB2	17long	4.40105	1.92227
144	ERBB2	17long	4.56474	2.00034
145	ERBB2	17long	4.9543	2.05516
146	ERBB2	17long	3.94152	1.86135
147	ERBB2	17long	4.34032	1.98383
148	ERBB2	17long	4.27581	2.03654
149	ERBB2	17long	3.99368	1.98112
150	ERBB2	17long	4.57339	1.99765
151	ERBB2	17long	4.84803	2.15709
152	ERBB2	17long	4.38123	2.05781
153	ERBB2	17long	4.53196	1.93543
154	ERBB2	17long	4.58747	1.98805
155	ERBB2	17long	4.90222	2.19148
156	ERBB2	17long	4.3899	2.13672
157	ERBB2	17long	4.22959	1.94699
158	ERBB2	17long	4.3125	1.93427
159	ERBB2	17long	4.59087	1.84142
160	ERBB2	17long	4.49497	2.0534
161	ERBB2	17long	4.68038	1.93849
162	BRCA1	17long	1.23763	1.9715
163	BRCA1	17long	1.34988	2.00633
164	BRCA1	17long	1.31389	1.89913
165	BRCA1	17long	1.47729	2.16523
166	BRCA1	17long	1.48327	2.00489
167	BRCA1	17long	1.49112	2.07323
168	BRCA1	17long	1.43632	2.15828
169	BRCA1	17long	1.45288	2.04222
170	BRCA1	17long	1.48991	2.06243
171	BRCA1	17long	1.35922	2.01424
172	BRCA1	17long	1.70067	1.98587
Fig. 2gh
Fresh frozen samples:		Groups
Patient	Sample ID	ERBB4	PIK3CA	ESR1	EGFR	PTEN	ERBB3	BRCA2	TP53	ERBB2	BRCA1	Chr17p	Chr17	ERBB2 IHC
p1	FF1	2.14916	2.3832	2	2.63778	2	2	2	1.71123	7.6317	1.74625	1.74739	2	Positive
p2	FF2	2	2	2	2	2	2	2	2	11.8337	2	1.88536	2	Positive
p3	FF3	2	2	2	2	2	2	1.38021	1.8268	1.88995	1.88745	1.87418	1.8873	Negative
p4	FF4	2	2	2	2	2	2	1.89475	1.74347	1.93037	2	1.82768	1.88893	Positive
p5	FF5	2	2	2	2	1.7113	2	2.2059	2	1.8472	1.84392	1.82751	1.84051	Negative
p6	FF6	1.68351	3.0969	2.47658	2	2	2	1.64476	0.79927	13.6641	2.29834	1.58413	2	Positive
p7	FF7	2	2	2	2	2	2	2	2	7.74137	2	1.80955	2	Positive
p8	FF8	1.79161	3.89075	2	2	2	2	1.38677	2	2	2	4.33555	2	Negative
p9	FF9	1.70079	2	2	2	2	2	1.19856	2.50469	1.82926	2	2.42494	2	Negative
p10	FF10	1.46619	2	2	2	2	2	1.43886	1.47208	1.47575	1.46922	1.43973	1.46498	Negative
p11	FF12	2	2	2	2	1.39587	2	1.45813	2	2	2	2	2	Negative
p12	FF14	2	2	2	2	2	2	2.35879	1.56526	34.7582	2	1.54012	2	Positive
p13	FF15	2	2	2	2	1.72825	2	1.83047	1.56423	6.91534	1.83074	1.39397	2	Positive
p14	FF19	2	1.51059	2	2	2	2	1.81165	1.43129	5.287	1.45288	1.43695	2	Positive
p15	FF16	1.6413	2	2	2	2	2.38959	2.2456	1.48329	2	2	1.53464	1.86937	Negative
p15	FF13	2	2	2	2	2	2	2	1.45338	2	2	1.44604	1.89998	Negative
p16	FF18	1.60404	2	2	2.86307	1.73467	2	2	1.1003	1.47613	1.29822	1.14119	1.28789	Negative
p16	FF17	2	2.61113	2	3.02524	2	2	2	1.2375	1.36886	1.37362	1.23154	1.29664	Negative

## Sheet: Fig3
Case #	1834
Days after diagnosis (cfDNA sampling)	0	115	265
HER2 ploidy in cfDNA by QASeq	4.36	2	5.77
VAF of Chr3:179218294G>A, PIK3CA c.1624G>A;p.E542K	0.182534	Not detected	0.27821
Days after diagnosis (FISH sampling)	-7	151	285
FISH ploidy	1.9	7.2	9.8
Case #	1844
Days after diagnosis	0	242	579	720
HER2 ploidy in cfDNA by QASeq	2	1.6	2	2
Case #	1890
Days after diagnosis	0	86
HER2 ploidy in cfDNA by QASeq	2	1.43
Case #	1914
Days after diagnosis	0	56	154	274	364
HER2 ploidy in cfDNA by QASeq	2	2	2	2	2
Case #	1969
Days after diagnosis	0	84	646
HER2 ploidy in cfDNA by QASeq	2.11	2	1.52
Case #	2071
Days after diagnosis	0	85	248	653
HER2 ploidy in cfDNA by QASeq	5.27	1.77	1.59	2
Case #	2366
Days after diagnosis	0	280	482	546
HER2 ploidy in cfDNA by QASeq	2	1.59	2	2
VAF of Chr17:39704873C>T, rs1309838194	0.542745	0.742962	0.790036	0.80305
Case #	2614
Days after diagnosis	0	91	199	259
HER2 ploidy in cfDNA by QASeq	2.44	2	2	2.39
Case #	2697
Days after diagnosis	0	118	188	288	344	498	548	638
HER2 ploidy in cfDNA by QASeq	2	2	2	2.32	2	2	2	2
VAF of Chr3:179234302G>C, PIK3CA c.3145G>C;p.G1049R	0.00523218	Not detected	0.00637755	0.0109131	0.00375352	0.0108517	0.0552528	0.0586833
Case #	2842
Days after diagnosis	0	385	434
HER2 ploidy in cfDNA by QASeq	1.76	2	1.56
Case #	3368
Days after diagnosis	0	92	278
HER2 ploidy in cfDNA by QASeq	2	2.17	2.47
Case #	3593
Days after diagnosis	0	89	173	341
HER2 ploidy in cfDNA by QASeq	2	2.28	2	2.39
Case #	3669
Days after diagnosis	0	90	214
HER2 ploidy in cfDNA by QASeq	2.32	3.94	2
VAF of Chr17:7674872T>C, TP53 c.659A>G;p.Y220C	0.0527256	0.323089	0.00520494
Case #	3677
Days after diagnosis	0	126
HER2 ploidy in cfDNA by QASeq	2	4.93
Case #	3718
Days after diagnosis	0	77	168	315	545
HER2 ploidy in cfDNA by QASeq	2	2.22	2	2.4	2
		Days after diagnosis
Case #	Alive/Deceased	Last follow-up or date of death	Progression 1 since enrolled	Progression 2	Progression 3	Progression 4
1834	ALIVE/WD	410	265
1844	DEAD/WD	1686	741	825	1294	1441
1890	ALIVE/WD	1394	1059
1914	ALIVE/NED	1346
1969	ALIVE/WD	1361
2071	ALIVE/WD	1257	828
2366	ALIVE/WD	1141	175	280	329	483
2614	ALIVE/WD	924
2697	DEAD/WD	644	56	317	344	638
2842	ALIVE/WD	915	316
3368	ALIVE/WD	704
3593	ALIVE/WD	637
3669	DEAD/WD	278	91	140
3677	ALIVE/WD	129	126
3718	ALIVE/WD	588

## Sheet: Fig4
Fig. 4a
	QASeq quantitation
ERCC ID	expected	observed
ERCC-00062	10582	6132
ERCC-00028	661.4	193
ERCC-00147	165.3	40
ERCC-00123	41.3	27
ERCC-00025	10582	7222
ERCC-00150	661.4	286
ERCC-00158	82.7	124
ERCC-00075	2.6	3
ERCC-00044	21164.1	14253
ERCC-00054	2645.5	364
ERCC-00164	82.7	9
ERCC-00057	2.6	1
ERCC-00022	42328.1	11901
ERCC-00078	5291	2512
ERCC-00069	330.7	184
ERCC-00048	2.6	6
Fig. 4b
		Replicate 1	Replicate 2
Expression level normalized to reference genes	AURKA	-6.82	-6.75
	BAG1	-1.8	-1.66
	BCL2	-5.92	-6.05
	BIRC5	-6.88	-6.64
	CCNB1	-6.87	-6.73
	CD68	-1.09	-1.2
	CTSV	-8.98	-9.39
	ERBB2	-2.73	-2.75
	ESR1	-2.79	-2.93
	GRB7	-5.29	-5.35
	MKI67	-7.95	-7.5
	MMP11	-9.56	-10.32
	MYBL2	-8.99	-8.94
	PGR	-8.36	-8.32
	SCUBE2	-8.69	-8.77
Fig. 4c
	Amplicon/gene for calculation
	1	2	3	4	5
BAG1	0.36757	0.126855	0.0856901	0.0749809	N.A.
PGR	1.50974	0.406183	0.198595	0.264585	0.271439
ERBB2	0.523832	0.0650019	0.0303677	0.0193781	N.A.
GRB7	1.14736	0.413632	0.215799	0.0694246	0.0462978
MKI67	0.198368	0.317288	0.317288	0.243335	N.A.
MMP11	3.93899	0.849456	0.796303	0.679227	N.A.
MYBL2	0.477504	0.428759	0.224228	0.2751	0.0680194
BIRC5	0.570369	0.228725	0.183095	N.A.	N.A.
ESR1	0.22005	0.0981558	0.165606	0.13485	0.12983
CD68	0.0483899	0.13197	0.0922382	0.114017	N.A.
CTSV	1.12912	0.774851	0.321611	0.294017	0.255714
BCL2	0.182836	0.0737489	N.A.	N.A.	N.A.
CCNB1	0.441709	0.32352	0.276487	0.219546	0.205426
SCUBE2	0.0687074	0.183028	0.315973	0.329258	0.480684
AURKA	0.263217	0.158563	0.211922	N.A.	N.A.
Fig. 4d
	log2(Relative expression level)
Gene	QASeq	Nanostring	Microarray	Standard RNASeq
ERBB2	-1.44	-2.14	-1.39	-0.99
BIRC5	-1.49	-2.45	-1.51	-2.01
MMP11	-1.92	-2.12	-3.65	-2.8
CD68	-2.21	-2.96	0.08	-2.8
MYBL2	-2.47	-4.2	-1.43	-2.79
MKI67	-3.01	-2.23	0.78	-2.67
GRB7	-3.05	-2.87	-1.95	-3.01
CCNB1	-3.24	-2.91	-1.33	-3.52
BAG1	-3.39	-3.08	-2.93	-3.75
AURKA	-4.69	-4.93	-1.73	-4.46
BCL2	-5.79	-6.82	-2.04	-4.99
CTSV	-6.45	NaN	-3.9	-7.11
ESR1	-7.25	-7.19	-3.82	-5.35
SCUBE2	-8.42	-6.98	-3.25	-10.46
PGR	-10.51	-8.43	-5.06	-9.06
Fig. 4e
Gene	Lung cancer	Breast cancer 1	Breast cancer 2	Breast cancer 3	Placenta 1	Placenta 2	Placenta 3
ESR1	-5.25	-0.01	-2.84	-7.25	-7.45	-6.93	-10.32
PGR	-4.73	-5.25	-5.31	-10.51	-6.28	-6.92	-7.12
AURKA	-5.91	-3.61	-5.23	-4.69	-4.67	-5.93	-6.47
SCUBE2	-3.17	-0.71	-5.07	-8.42	-5.17	-5.24	-6.42
MKI67	-5.85	-5.01	-3.84	-3.01	-3.82	-5.17	-6.13
CCNB1	-4.73	-2.66	-2.9	-3.24	-3.74	-5.19	-5.43
MYBL2	-5.76	-3.91	-3.27	-2.47	-3.33	-4.8	-5.88
BIRC5	-5.07	-2.07	-1.86	-1.49	-3.45	-4.7	-5.38
CTSV	-9.46	-7.76	-7.5	-6.45	-3.88	-4.47	-4.87
GRB7	-1.36	-1.58	-0.72	-3.05	-4.65	-2.68	-3.48
BCL2	-5.9	-1.2	-3.34	-5.79	-4.21	-2.68	-1.43
BAG1	-1.6	-2.03	-2.87	-3.39	-2.32	-1.88	-3.42
CD68	-5.15	-1.78	-1.82	-2.21	-1.95	-3.24	-2.13
ERBB2	-1.54	-0.43	1.27	-1.44	-3	-1.57	-1.67
MMP11	-3.7	-0.56	0.47	-1.92	-3.57	-0.23	0.75
